# Supplementary material
Source: PubMed Central journal article supplement (PMC4008691)
Supplement: NIHMS573484-supplement-259_2013_2678_MOESM1_ESM.pdf [file NIHMS573484-supplement-259_2013_2678_MOESM1_ESM.pdf]

## SUPPLEMENTARY MATERIALS

### *SUPPLEMENTARY FIGURES*

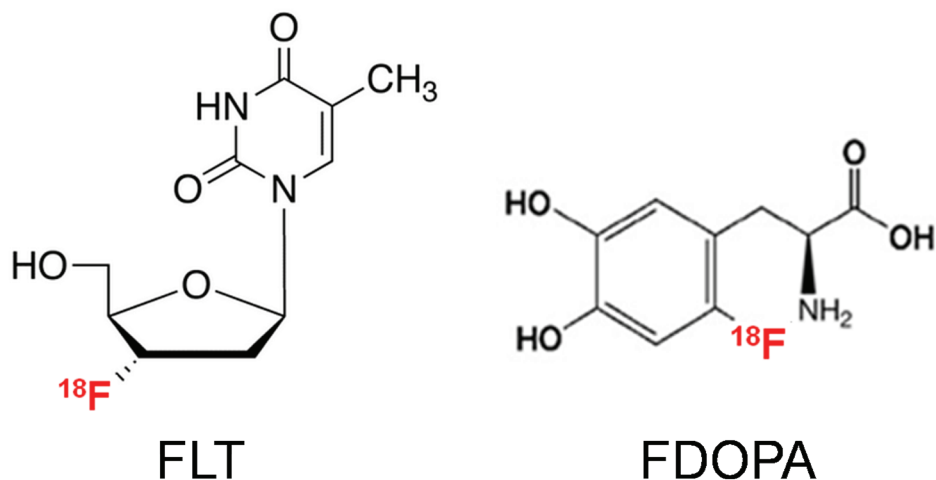

**Supplementary Figure S1.** Chemical structures of FLT and FDOPA. Unlabeled FLT was originally synthesized as an anti-cancer and anti-retroviral agent, and is similar in concept to azidothymidine, the first approved anti-AIDS drug [1, 2]. FLT acts as a DNA chain terminator because it lacks a 3'-hydroxyl group on the deoxyribose ring. FLT is not a substrate for thymidine phosphorylase (which is an enzyme that cleaves the sugar from the thymine base), but it is a good substrate for thymidine kinase 1 and therefore reflects metabolism by the DNA salvage pathway [1]. PET imaging with FLT was first reported by Shields *et al.* [3]. FDOPA was initially used in PET to visualize and assess the presynaptic integrity of the nigrostriatal dopamine pathway in the evaluation of patients with movement disorders such as Parkinson's disease [4, 5]. FDOPA, however, is also an amino acid analog and was shown to be taken up at the blood-brain barrier in the normal brain by neutral amino acid transporters [6]. The initial report to demonstrate the value of FDOPA PET for the detection of brain tumors came as an incidental finding in a patient undergoing evaluation for a light movement disorder of the left arm and hand [7]. The FDOPA PET scan showed that the patient not only had an asymmetric reduction in dopamine uptake in the putamen, but also a low-grade glioma in the right frontal lobe [7].

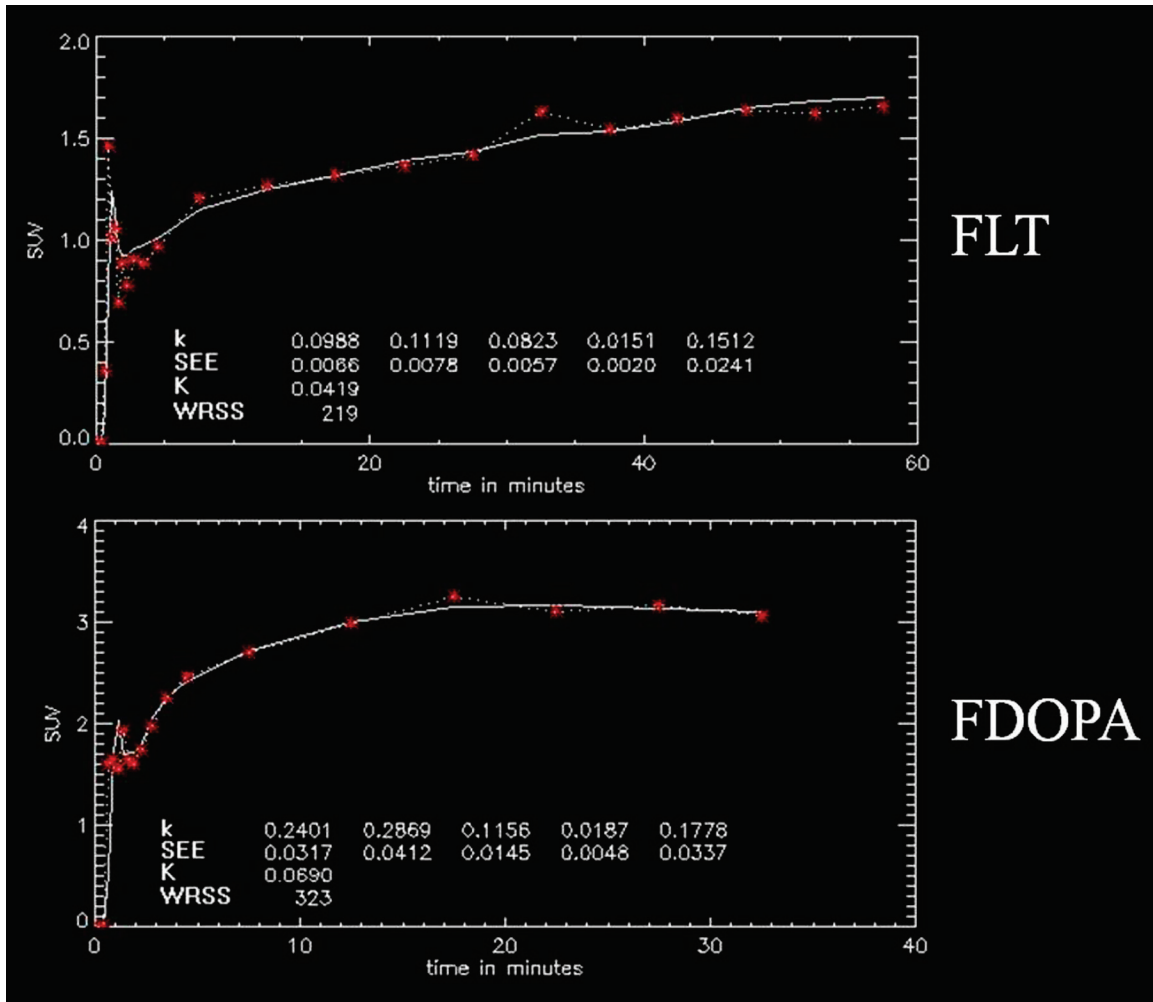

**Supplementary Figure S2.** Measured (dashed line and red markers) and model fitted (solid white line) tumor time-activity curves for FLT and FDOPA PET studies after the start of treatment. Tumor curves shown above are from a short-term survivor (Patient 4 in Table 1). Notice the early vascular component in the measured and fitted data.

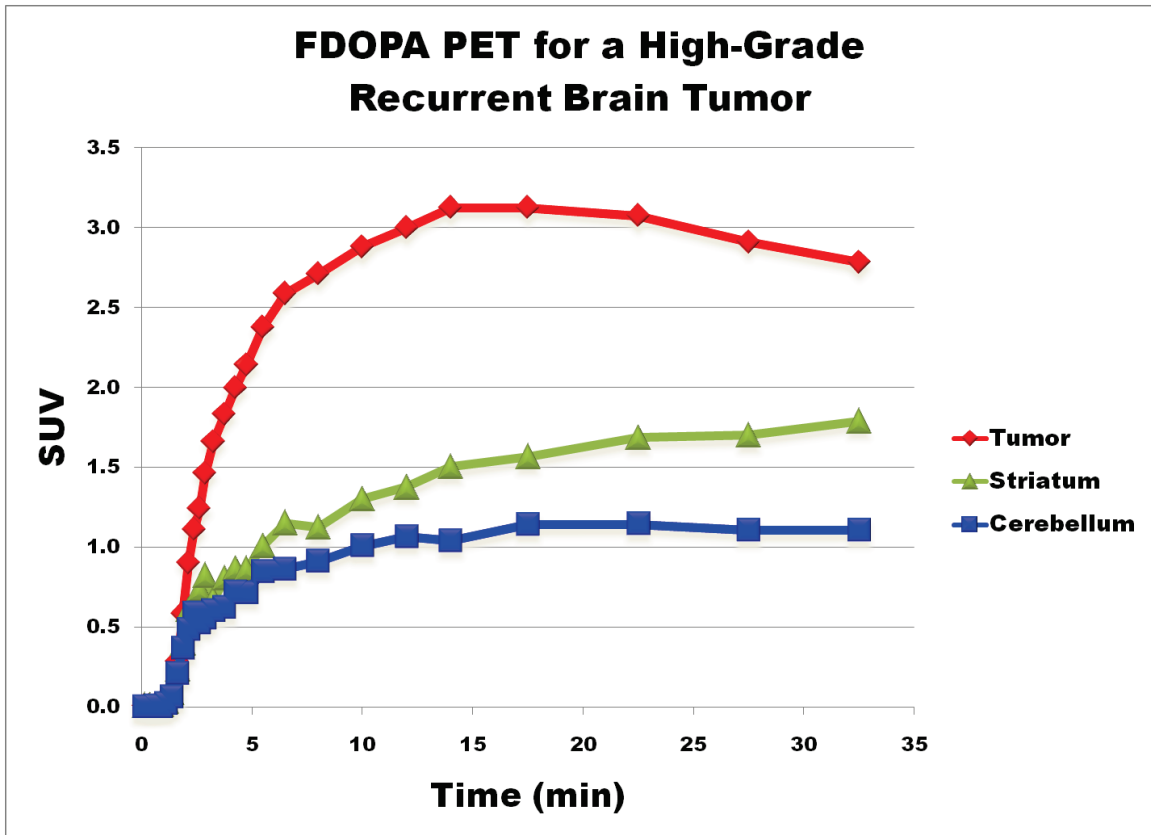

**Supplementary Figure S3.** Sample FDOPA time-activity curves of the tumor, striatum, and cerebellum for a recurrent brain tumor patient at baseline.

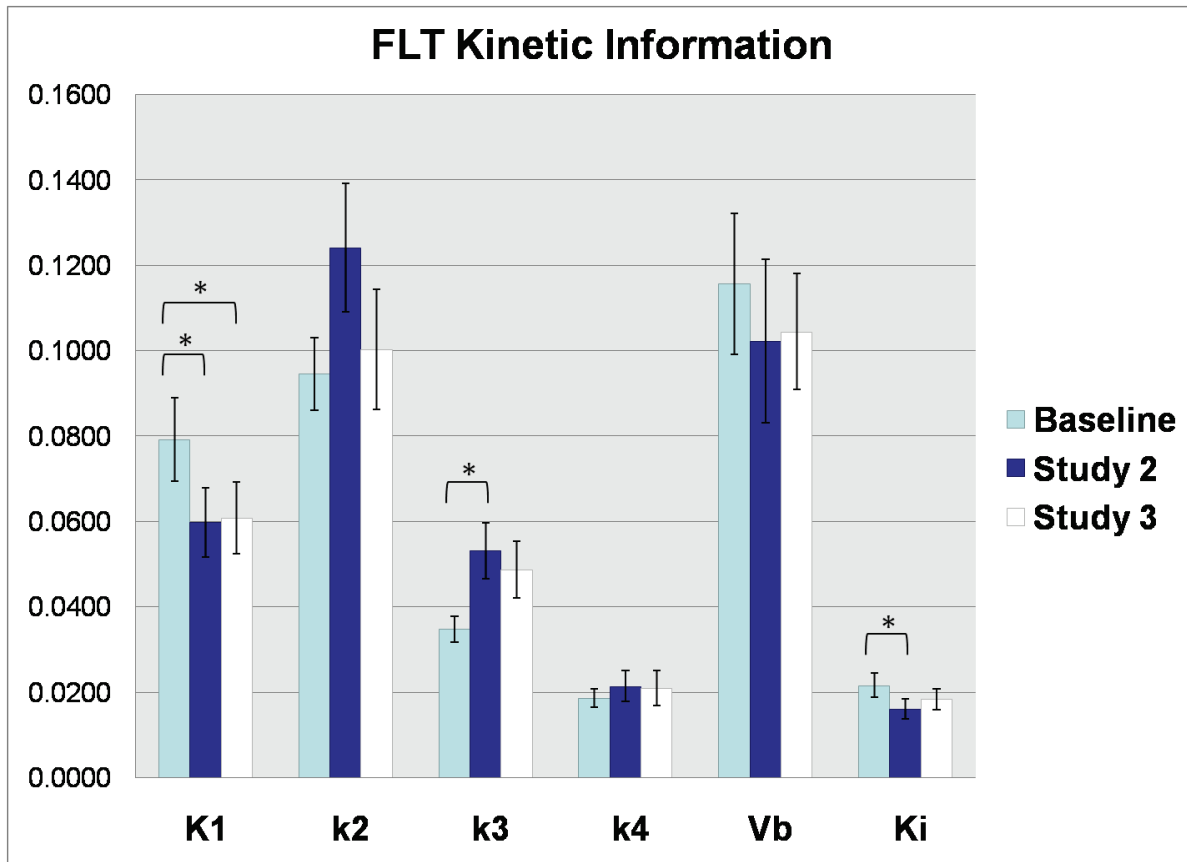

**Supplementary Figure S4.** Bar graphs showing the sample mean  $\pm$  SEM for the various FLT kinetic microparameters and the FLT influx rate constant  $K_i$  at each of the three study time points (i.e., at baseline and after 2 and 6 weeks from the start of treatment). Asterisks and hanging bars indicate where significant paired sample differences were found between time points using the Wilcoxon signed-rank test. If the Bonferroni method was applied to correct for multiple comparisons, then the paired sample differences for  $K_1$  between baseline and study 3 would no longer be significant, while the other starred differences shown above would remain significant.

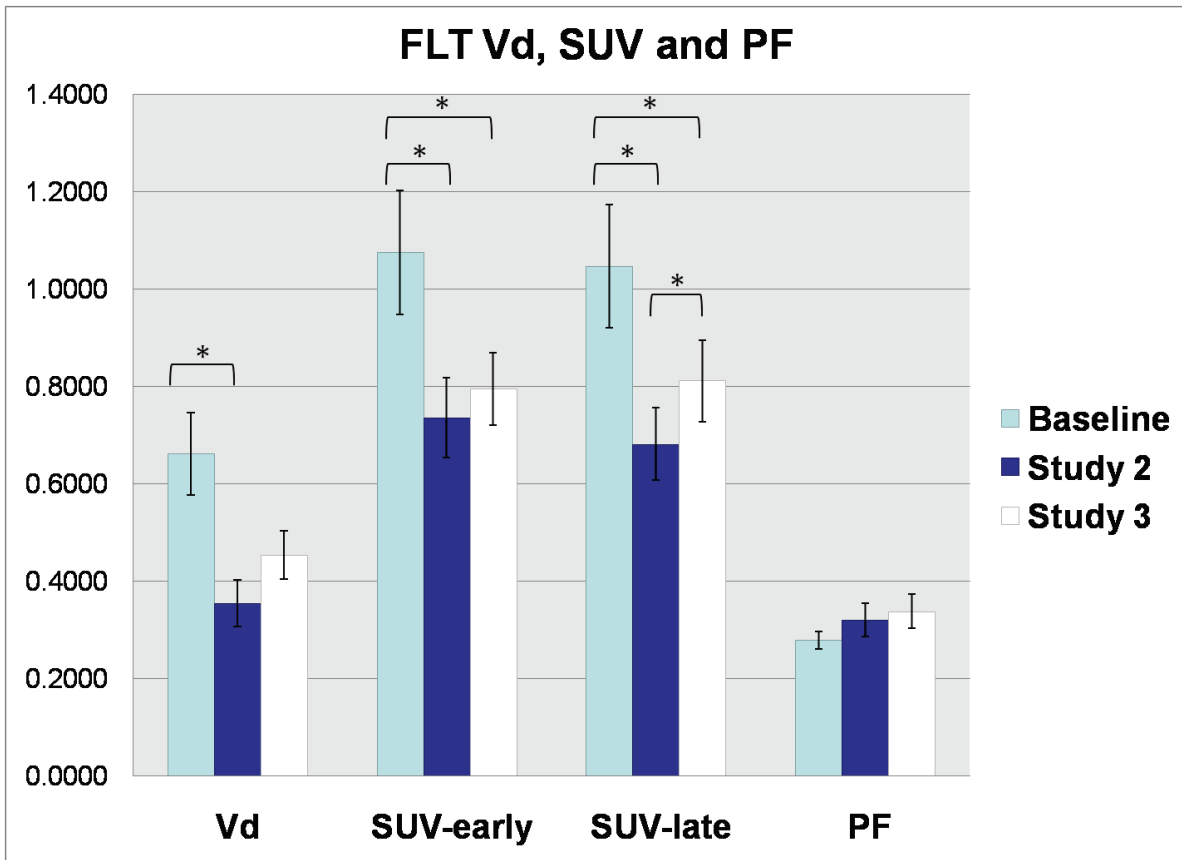

**Supplementary Figure S5.** Bar graphs showing the sample mean  $\pm$  SEM for FLT  $V_d$ , SUV (early and late), and PF at each of the three study time points (i.e., at baseline and after 2 and 6 weeks from the start of treatment). SUV is a unitless parameter. Asterisks and hanging bars indicate where significant paired sample differences were found between time points using the Wilcoxon signed-rank test. If the Bonferroni method was applied to correct for multiple comparisons, then the paired sample differences for  $SUV_{late}$  between baseline and study 3 would no longer be significant, while the other starred differences shown above would remain significant.

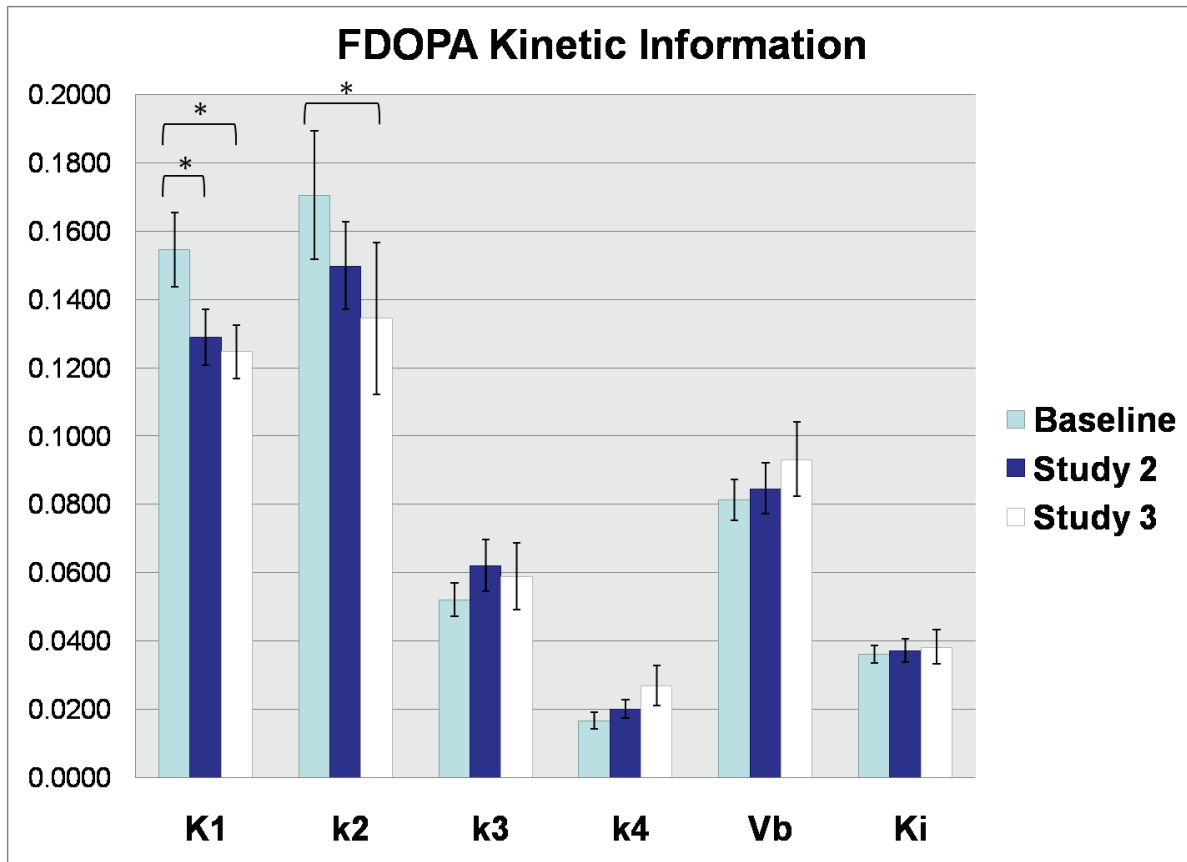

**Supplementary Figure S6.** Bar graphs showing the sample mean  $\pm$  SEM for the various FDOPA kinetic microparameters and the FDOPA influx rate constant  $K_i$  at each of the three study time points (i.e., at baseline and after 2 and 6 weeks from the start of treatment). Asterisks and hanging bars indicate where significant paired sample differences were found between time points using the Wilcoxon signed-rank test. If the Bonferroni method was applied to correct for multiple comparisons, then the starred differences shown above would remain significant even at the new adjusted  $P$ -value.

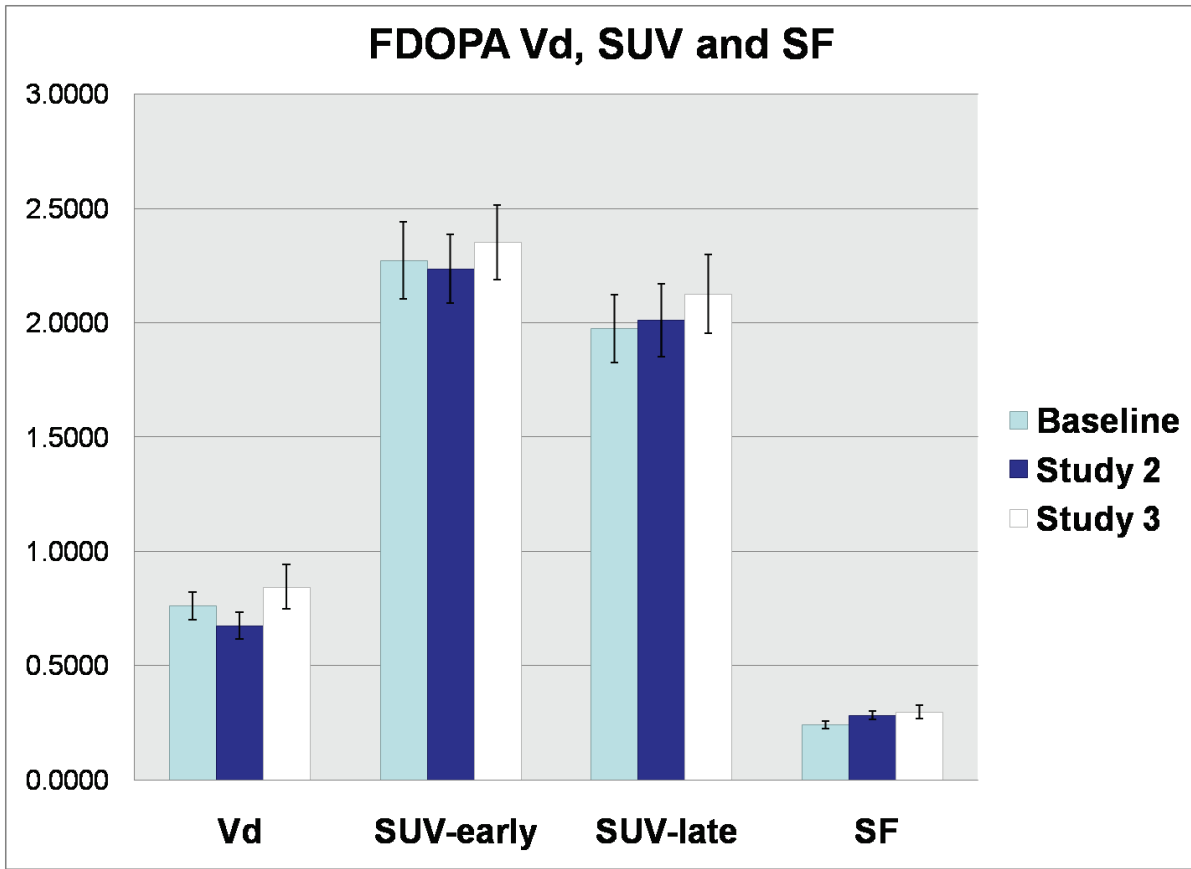

**Supplementary Figure S7.** Bar graphs showing the sample mean  $\pm$  SEM for FDOPA  $V_d$ , SUV (early and late), and SF at each of the three study time points (i.e., at baseline and after 2 and 6 weeks from the start of treatment). SF is a dimensionless parameter. No significant paired sample differences were found between time points using the Wilcoxon signed-rank test.

**A**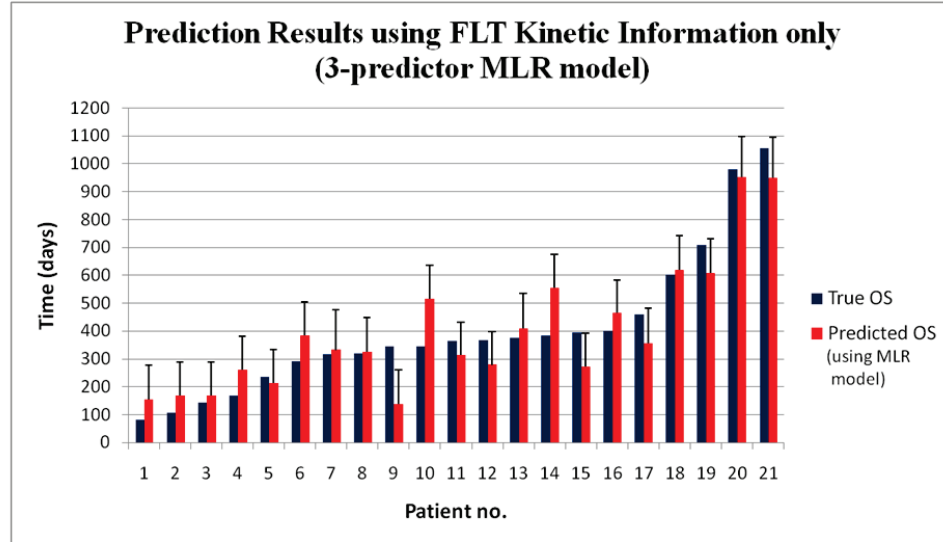**B**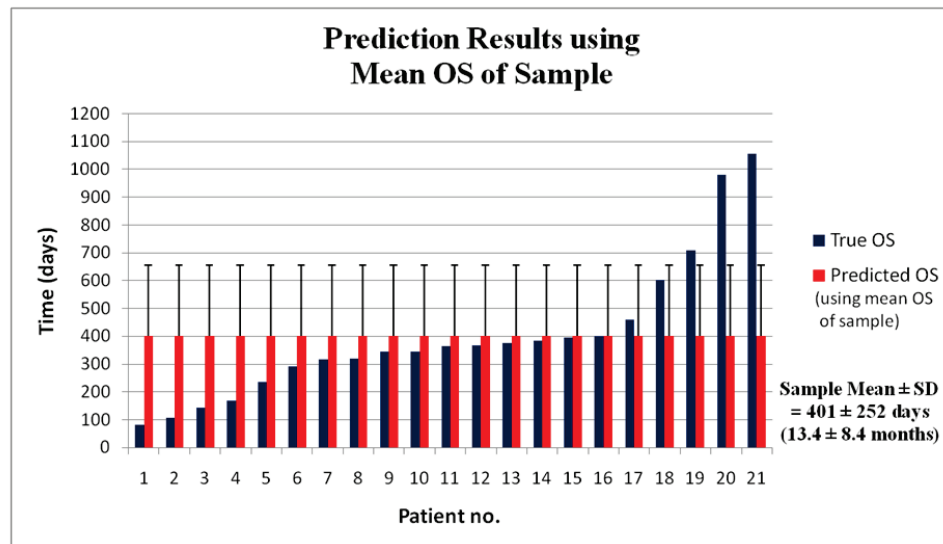

**Supplementary Figure S8. (A)** Bar graphs showing the true OS and model predicted OS when using only FLT kinetic information in selecting the best three-predictor MLR model. Error bars denote 1 SD. **(B)** Bar graphs showing the true OS of each patient and the mean OS of the sample. If the mean OS of the sample was used for predicting each patient's OS, then every patient would have a predicted OS of  $401 \pm 252$  days ( $13.2 \pm 8.3$  months); with 1 SD, this prediction is anywhere from 4.9-21.5 months. Error bars denote 1 SD.



**SUPPLEMENTARY TABLES**

**Supplementary Table S1.** Percent change in FLT and FDOPA kinetic parameters (Baseline → 2 weeks).

| Patient No.      | FLT          |              |              |              |              |              |              |             | FDOPA        |              |              |              |              |              |              |             |
|------------------|--------------|--------------|--------------|--------------|--------------|--------------|--------------|-------------|--------------|--------------|--------------|--------------|--------------|--------------|--------------|-------------|
|                  | $\Delta K_1$ | $\Delta k_2$ | $\Delta k_3$ | $\Delta k_4$ | $\Delta V_b$ | $\Delta K_i$ | $\Delta V_d$ | $\Delta PF$ | $\Delta K_1$ | $\Delta k_2$ | $\Delta k_3$ | $\Delta k_4$ | $\Delta V_b$ | $\Delta K_i$ | $\Delta V_d$ | $\Delta SF$ |
| 1                | 128          | 143          | 59           | -52          | -63          | 69           | 7            | -26         | -30          | 29           | -1           | -95          | -48          | -43          | -43          | -20         |
| 2                | 69           | 202          | 58           | -37          | 17           | 2            | -36          | -40         | -43          | -68          | -17          | 1800         | 33           | 19           | 44           | 111         |
| 3                | -20          | 67           | -9           | -13          | 7            | -46          | -41          | -33         | -11          | 5            | -31          | -59          | -18          | -36          | -6           | -27         |
| 4                | 3            | 324          | 236          | 32           | -48          | -12          | -74          | -14         | 26           | 76           | 67           | 31           | 36           | 21           | -28          | -4          |
| 5                | -34          | -11          | -44          | 1            | 61           | -53          | -16          | -29         | -10          | -26          | -34          | -30          | -17          | -16          | 27           | -7          |
| 6                | -78          | -52          | 103          | -12          | -37          | -52          | -76          | 120         | -42          | -53          | -71          | -50          | -2           | -61          | 37           | -32         |
| 7                | -50          | -47          | -42          | 137          | 2            | -46          | -8           | 8           | -33          | 27           | 246          | 143          | -32          | 39           | -60          | 108         |
| 8                | -28          | 135          | 208          | -42          | -43          | -10          | -71          | 25          | -33          | -51          | 4            | -13          | 21           | 13           | 9            | 67          |
| 9                | -49          | 15           | -25          | -60          | -81          | -60          | -47          | -23         | -2           | -6           | -24          | -27          | -10          | -17          | 10           | -15         |
| 10               | -41          | 137          | 406          | 103          | 1            | -8           | -82          | 56          | -17          | 61           | 30           | 4            | 11           | -30          | -46          | -15         |
| 11               | 61           | 90           | 16           | 19           | -52          | 10           | -5           | -32         | -37          | -20          | -4           | -59          | -48          | -27          | -25          | 14          |
| 12               | -23          | 24           | 24           | 33           | -42          | -22          | -38          | 0           | -14          | -42          | 21           | 503          | -36          | 52           | 26           | 76          |
| 13               | -18          | 45           | 39           | -12          | -45          | -21          | -43          | -3          | 48           | 1            | 1            | 29           | 6            | 48           | 47           | 0           |
| 14               | -53          | -40          | -7           | 56           | 90           | -37          | -32          | 34          | -17          | -37          | 49           | 460          | 37           | 52           | 2            | 83          |
| 15               | -18          | 89           | -9           | 26           | 29           | -56          | -52          | -47         | -29          | 21           | 151          | 407          | 69           | 18           | -53          | 68          |
| 16               | -28          | 25           | 55           | -3           | -48          | -18          | -47          | 15          | -8           | -3           | -6           | -18          | 21           | -10          | -5           | -2          |
| 17               | -16          | 7            | 19           | -65          | -37          | -8           | -23          | 9           | -29          | -8           | 9            | -6           | 30           | -18          | -25          | 14          |
| 18               | -9           | 101          | 305          | 174          | 1247         | 55           | -62          | 70          | 7            | -12          | -23          | -74          | 6            | -3           | 26           | -9          |
| 19               | -16          | 6            | 84           | 32           | -13          | 19           | -35          | 42          | -8           | 27           | 153          | 256          | 94           | 64           | -36          | 78          |
| 20               | -76          | -63          | -13          | 35           | 45           | -57          | -51          | 80          | 18           | 32           | 124          | 129          | 96           | 69           | -25          | 43          |
| 21               | -72          | -75          | 92           | 330          | 244          | -22          | -59          | 177         | 2            | -3           | -19          | 53           | -40          | -12          | 9            | -14         |
| <b>Median</b>    | -23          | 25           | 39           | 19           | -13          | -21          | -43          | 8           | -14          | -3           | 1            | 4            | 6            | -3           | -5           | 0           |
| <b>Mean ± SD</b> | -18 ± 50     | 53 ± 98      | 74 ± 119     | 32 ± 92      | 59 ± 281     | -18 ± 35     | -42 ± 24     | 19 ± 57     | -12 ± 23     | -2 ± 37      | 30 ± 78      | 161 ± 416    | 10 ± 42      | 6 ± 38       | -5 ± 33      | 25 ± 47     |

6

**Supplementary Table S2.** Percent change in FLT and FDOPA kinetic parameters (Baseline → 6 weeks).

| Patient No.      | FLT          |              |              |              |              |              |              |             | FDOPA        |              |              |              |              |              |              |             |
|------------------|--------------|--------------|--------------|--------------|--------------|--------------|--------------|-------------|--------------|--------------|--------------|--------------|--------------|--------------|--------------|-------------|
|                  | $\Delta K_1$ | $\Delta k_2$ | $\Delta k_3$ | $\Delta k_4$ | $\Delta V_b$ | $\Delta K_i$ | $\Delta V_d$ | $\Delta PF$ | $\Delta K_1$ | $\Delta k_2$ | $\Delta k_3$ | $\Delta k_4$ | $\Delta V_b$ | $\Delta K_i$ | $\Delta V_d$ | $\Delta SF$ |
| 1                | 21           | -7           | -28          | -45          | -52          | 1            | 41           | -16         | 30           | 170          | 16           | 3            | -43          | -37          | -46          | -52         |
| 2                | 123          | 35           | -6           | -26          | 26           | 70           | 80           | -24         | -5           | -32          | 112          | 2109         | 25           | 124          | 6            | 137         |
| 3                | -52          | 3            | 119          | 8            | 45           | -30          | -68          | 46          | -23          | -25          | -67          | -44          | -11          | -60          | 21           | -48         |
| 4                | -26          | 72           | 127          | 26           | 15           | -13          | -62          | 18          | -7           | 9            | 130          | 269          | 84           | 47           | -36          | 58          |
| 5                | -46          | -27          | -10          | 24           | 22           | -38          | -32          | 15          | -18          | -58          | -63          | 174          | 11           | -25          | 102          | -9          |
| 6                | -53          | -66          | -34          | -63          | -68          | -28          | 8            | 54          | -17          | -37          | 16           | 35           | 63           | 27           | 10           | 53          |
| 7                | -63          | -43          | -55          | 17           | -60          | -69          | -31          | -17         | -57          | -35          | 67           | 98           | -11          | -15          | -49          | 101         |
| 8                | -40          | 73           | 426          | 122          | 49           | 40           | -73          | 135         | -42          | -80          | -71          | -76          | -59          | -26          | 157          | 28          |
| 9                | -42          | -60          | -84          | -53          | -45          | -68          | 98           | -44         | -20          | 7            | 69           | 83           | 4            | 8            | -36          | 35          |
| 10               | -33          | 99           | 269          | 108          | -2           | -3           | -74          | 45          | -38          | -47          | -43          | 51           | 71           | -35          | 15           | 6           |
| 11               | 65           | 26           | -15          | -15          | -26          | 22           | 44           | -27         | -11          | 22           | 75           | 20           | -13          | 15           | -34          | 30          |
| 12               | -48          | -21          | 53           | 9            | -11          | -15          | -45          | 63          | -24          | -59          | -44          | 124          | -2           | -3           | 73           | 28          |
| 13               | -4           | 131          | 264          | 34           | -37          | 25           | -66          | 31          | 31           | -61          | -93          | 11           | 127          | -64          | 417          | -73         |
| 14               | 4            | -35          | -18          | -1           | 23           | 22           | 49           | 19          | -12          | -59          | 205          | 1316         | 135          | 175          | -10          | 213         |
| 15               | -35          | -23          | -18          | -20          | -22          | -31          | -16          | 5           | -37          | -24          | 7            | 181          | 11           | -18          | -23          | 30          |
| 16               | 21           | 65           | -14          | -62          | -46          | -26          | -14          | -39         | 9            | 1            | -23          | -77          | 13           | -11          | 16           | -19         |
| 17               | -29          | 72           | 179          | -47          | 187          | 8            | -62          | 50          | -56          | -50          | -4           | -40          | 2            | -30          | -26          | 60          |
| 18               | 49           | 20           | 187          | 226          | 949          | 186          | -1           | 90          | 2            | -5           | 38           | 33           | -14          | 31           | -5           | 29          |
| 19               | 16           | 39           | -21          | 34           | 8            | -24          | -4           | -35         | -15          | 37           | 239          | 209          | 45           | 78           | -48          | 109         |
| 20               | -55          | -4           | 13           | 28           | -19          | -48          | -55          | 14          | 25           | -9           | 2            | -50          | -58          | 34           | 32           | 8           |
| 21               | -66          | -82          | 120          | 400          | 8            | 2            | -53          | 207         | -25          | -36          | -60          | 72           | -8           | -50          | 26           | -33         |
| <b>Median</b>    | -33          | 3            | -6           | 9            | -2           | -13          | -31          | 18          | -17          | -32          | 7            | 51           | 4            | -11          | 6            | 29          |
| <b>Mean ± SD</b> | -14 ± 49     | 13 ± 58      | 69 ± 133     | 34 ± 108     | 45 ± 214     | -1 ± 55      | -16 ± 52     | 28 ± 61     | -15 ± 25     | -18 ± 53     | 24 ± 90      | 214 ± 522    | 18 ± 53      | 8 ± 60       | 27 ± 103     | 33 ± 67     |

10

**Supplementary Table S3.** Percent change in FLT and FDOPA kinetic parameters (2 weeks → 6 weeks).

| Patient No.      | FLT          |              |              |              |              |              |              |             | FDOPA        |              |              |              |              |              |              |             |
|------------------|--------------|--------------|--------------|--------------|--------------|--------------|--------------|-------------|--------------|--------------|--------------|--------------|--------------|--------------|--------------|-------------|
|                  | $\Delta K_1$ | $\Delta k_2$ | $\Delta k_3$ | $\Delta k_4$ | $\Delta V_b$ | $\Delta K_i$ | $\Delta V_d$ | $\Delta PF$ | $\Delta K_1$ | $\Delta k_2$ | $\Delta k_3$ | $\Delta k_4$ | $\Delta V_b$ | $\Delta K_i$ | $\Delta V_d$ | $\Delta SF$ |
| 1                | -47          | -62          | -55          | 16           | 28           | -40          | 32           | -47         | 85           | 110          | 18           | 1900         | 8            | 11           | -6           | -40         |
| 2                | 32           | -55          | -40          | 16           | 8            | 67           | 180          | 32          | 67           | 116          | 157          | 16           | -6           | 88           | -27          | 12          |
| 3                | -40          | -38          | 141          | 24           | 36           | 31           | -46          | -40         | -14          | -29          | -52          | 38           | 9            | -38          | 29           | -28         |
| 4                | -28          | -59          | -32          | -4           | 120          | -1           | 47           | -28         | -26          | -38          | 38           | 182          | 36           | 21           | -12          | 64          |
| 5                | -18          | -18          | 63           | 23           | -25          | 33           | -19          | -18         | -9           | -43          | -44          | 291          | 33           | -11          | 59           | -2          |
| 6                | 114          | -30          | -67          | -58          | -50          | 51           | 358          | 114         | 43           | 35           | 302          | 171          | 66           | 224          | -20          | 126         |
| 7                | -25          | 7            | -24          | -51          | -61          | -43          | -25          | -25         | -37          | -49          | -52          | -19          | 31           | -38          | 27           | -3          |
| 8                | -17          | -26          | 71           | 283          | 162          | 57           | -9           | -17         | -15          | -58          | -72          | -72          | -66          | -34          | 137          | -23         |
| 9                | 13           | -65          | -78          | 16           | 185          | -18          | 274          | 13          | -18          | 15           | 124          | 151          | 16           | 30           | -42          | 59          |
| 10               | 13           | -16          | -27          | 2            | -3           | 5            | 45           | 13          | -26          | -67          | -56          | 45           | 54           | -7           | 111          | 25          |
| 11               | 3            | -33          | -27          | -28          | 55           | 11           | 52           | 3           | 40           | 52           | 82           | 191          | 68           | 58           | -13          | 13          |
| 12               | -33          | -37          | 23           | -18          | 51           | 9            | -11          | -33         | -12          | -29          | -54          | -63          | 54           | -36          | 38           | -27         |
| 13               | 17           | 59           | 162          | 52           | 14           | 58           | -40          | 17          | -12          | -61          | -93          | -14          | 114          | -76          | 252          | -73         |
| 14               | 120          | 7            | -11          | -37          | -35          | 95           | 121          | 120         | 5            | -36          | 104          | 153          | 72           | 81           | -12          | 71          |
| 15               | -21          | -59          | -10          | -37          | -39          | 58           | 76           | -21         | -10          | -37          | -57          | -45          | -35          | -30          | 62           | -23         |
| 16               | 69           | 32           | -44          | -61          | 5            | -11          | 61           | 69          | 19           | 4            | -19          | -72          | -6           | -1           | 22           | -17         |
| 17               | -15          | 61           | 134          | 49           | 354          | 16           | -50          | -15         | -38          | -45          | -12          | -37          | -21          | -14          | -1           | 40          |
| 18               | 65           | -40          | -29          | 19           | -22          | 84           | 159          | 65          | -5           | 8            | 80           | 420          | -19          | 35           | -25          | 42          |
| 19               | 39           | 31           | -57          | 1            | 24           | -36          | 48           | 39          | -7           | 8            | 34           | -13          | -25          | 9            | -18          | 18          |
| 20               | 91           | 158          | 30           | -5           | -44          | 20           | -7           | 91          | 6            | -31          | -55          | -78          | -79          | -20          | 75           | -25         |
| 21               | 20           | -27          | 15           | 16           | -69          | 31           | 15           | 20          | -27          | -34          | -51          | 12           | 53           | -43          | 16           | -23         |
| <b>Median</b>    | 13           | -27          | -24          | 2            | 8            | 20           | 45           | 13          | -10          | -31          | -19          | 16           | 16           | -7           | 16           | -2          |
| <b>Mean ± SD</b> | 17 ± 50      | -10 ± 54     | 7 ± 70       | 10 ± 70      | 33 ± 101     | 23 ± 40      | 60 ± 107     | 17 ± 50     | 0 ± 33       | -10 ± 52     | 15 ± 97      | 150 ± 422    | 17 ± 48      | 10 ± 65      | 31 ± 69      | 9 ± 46      |

**Supplementary Table S4.** FLT kinetic parameters at the baseline study.

| Patient No.      | K <sub>1</sub>  | k <sub>2</sub>  | k <sub>3</sub>  | k <sub>4</sub>  | V <sub>b</sub>  | K <sub>i</sub>  | V <sub>d</sub>  | PF              | SEE-K <sub>1</sub> | SEE-k <sub>2</sub> | SEE-k <sub>3</sub> | SEE-k <sub>4</sub> | SEE-V <sub>b</sub> |
|------------------|-----------------|-----------------|-----------------|-----------------|-----------------|-----------------|-----------------|-----------------|--------------------|--------------------|--------------------|--------------------|--------------------|
| 1                | 0.0224          | 0.0571          | 0.0307          | 0.0316          | 0.1720          | 0.0078          | 0.2549          | 0.3497          | 0.0078             | 0.0270             | 0.0267             | 0.0341             | 0.0391             |
| 2                | 0.0391          | 0.0541          | 0.0209          | 0.0193          | 0.0803          | 0.0109          | 0.5214          | 0.2787          | 0.0017             | 0.0033             | 0.0017             | 0.0054             | 0.0082             |
| 3                | 0.0656          | 0.0431          | 0.0297          | 0.0163          | 0.0748          | 0.0268          | 0.9014          | 0.4080          | 0.0036             | 0.0061             | 0.0057             | 0.0033             | 0.0198             |
| 4                | 0.1341          | 0.0650          | 0.0362          | 0.0120          | 0.1312          | 0.0479          | 1.3254          | 0.3577          | 0.0133             | 0.0135             | 0.0058             | 0.0044             | 0.0378             |
| 5                | 0.0792          | 0.0724          | 0.0353          | 0.0137          | 0.0599          | 0.0260          | 0.7355          | 0.3278          | 0.0042             | 0.0038             | 0.0048             | 0.0026             | 0.0132             |
| 6                | 0.0707          | 0.1120          | 0.0445          | 0.0399          | 0.1659          | 0.0201          | 0.4521          | 0.2843          | 0.0089             | 0.0277             | 0.0096             | 0.0106             | 0.0210             |
| 7                | 0.1731          | 0.1221          | 0.0377          | 0.0078          | 0.1174          | 0.0408          | 1.0830          | 0.2359          | 0.0122             | 0.0133             | 0.0057             | 0.0014             | 0.0221             |
| 8                | 0.0532          | 0.0864          | 0.0145          | 0.0129          | 0.0719          | 0.0077          | 0.5276          | 0.1437          | 0.0039             | 0.0148             | 0.0043             | 0.0147             | 0.0140             |
| 9                | 0.0569          | 0.0660          | 0.0519          | 0.0367          | 0.2577          | 0.0250          | 0.4825          | 0.4402          | 0.0094             | 0.0191             | 0.0142             | 0.0143             | 0.0480             |
| 10               | 0.0744          | 0.0293          | 0.0143          | 0.0122          | 0.0787          | 0.0244          | 1.7034          | 0.3280          | 0.0042             | 0.0037             | 0.0015             | 0.0039             | 0.0270             |
| 11               | 0.0510          | 0.0997          | 0.0364          | 0.0109          | 0.0745          | 0.0136          | 0.3746          | 0.2675          | 0.0042             | 0.0119             | 0.0047             | 0.0021             | 0.0116             |
| 12               | 0.1528          | 0.1650          | 0.0418          | 0.0180          | 0.1248          | 0.0308          | 0.7389          | 0.2021          | 0.0126             | 0.0201             | 0.0033             | 0.0036             | 0.0216             |
| 13               | 0.1103          | 0.0642          | 0.0357          | 0.0236          | 0.1551          | 0.0394          | 1.1041          | 0.3574          | 0.0027             | 0.0025             | 0.0015             | 0.0014             | 0.0114             |
| 14               | 0.0478          | 0.1146          | 0.0444          | 0.0117          | 0.0363          | 0.0134          | 0.3007          | 0.2792          | 0.0036             | 0.0137             | 0.0025             | 0.0019             | 0.0074             |
| 15               | 0.0864          | 0.1139          | 0.0223          | 0.0121          | 0.0967          | 0.0141          | 0.6346          | 0.1637          | 0.0085             | 0.0130             | 0.0022             | 0.0050             | 0.0228             |
| 16               | 0.1522          | 0.1542          | 0.0692          | 0.0394          | 0.3422          | 0.0472          | 0.6813          | 0.3098          | 0.0108             | 0.0177             | 0.0055             | 0.0075             | 0.0275             |
| 17               | 0.1222          | 0.1441          | 0.0215          | 0.0144          | 0.1110          | 0.0158          | 0.7379          | 0.1298          | 0.0092             | 0.0137             | 0.0015             | 0.0032             | 0.0147             |
| 18               | 0.0314          | 0.0556          | 0.0127          | 0.0050          | 0.0081          | 0.0058          | 0.4595          | 0.1859          | 0.0017             | 0.0059             | 0.0016             | 0.4303             | 0.0135             |
| 19               | 0.0356          | 0.1078          | 0.0452          | 0.0204          | 0.0902          | 0.0105          | 0.2325          | 0.2954          | 0.0057             | 0.0208             | 0.0082             | 0.0257             | 0.0159             |
| 20               | 0.0715          | 0.1250          | 0.0363          | 0.0127          | 0.0450          | 0.0161          | 0.4430          | 0.2250          | 0.0043             | 0.0099             | 0.0021             | 0.0036             | 0.0052             |
| 21               | 0.0327          | 0.1325          | 0.0477          | 0.0197          | 0.1336          | 0.0087          | 0.1817          | 0.2647          | 0.0072             | 0.0271             | 0.0113             | 0.0072             | 0.0206             |
| <b>Median</b>    | 0.0707          | 0.0997          | 0.0362          | 0.0144          | 0.0967          | 0.0161          | 0.5276          | 0.2792          | 0.0057             | 0.0135             | 0.0047             | 0.0044             | 0.0198             |
| <b>Mean ± SD</b> | 0.0792 ± 0.0447 | 0.0945 ± 0.0387 | 0.0347 ± 0.0139 | 0.0186 ± 0.0102 | 0.1156 ± 0.0756 | 0.0216 ± 0.0132 | 0.6608 ± 0.3853 | 0.2778 ± 0.0835 | 0.0067 ± 0.0037    | 0.0137 ± 0.0079    | 0.0059 ± 0.0059    | 0.0279 ± 0.0926    | 0.0201 ± 0.0110    |

\* SEE = standard error of the estimate.

**Supplementary Table S5.** FLT kinetic parameters at 2 weeks after the start of therapy.

| Patient No.      | K <sub>1</sub>  | k <sub>2</sub>  | k <sub>3</sub>  | k <sub>4</sub>  | V <sub>b</sub>  | K <sub>i</sub>  | V <sub>d</sub>  | PF              | SEE-K <sub>1</sub> | SEE-k <sub>2</sub> | SEE-k <sub>3</sub> | SEE-k <sub>4</sub> | SEE-V <sub>b</sub> |
|------------------|-----------------|-----------------|-----------------|-----------------|-----------------|-----------------|-----------------|-----------------|--------------------|--------------------|--------------------|--------------------|--------------------|
| 1                | 0.0510          | 0.1388          | 0.0487          | 0.0151          | 0.0645          | 0.0132          | 0.2722          | 0.2597          | 0.0067             | 0.0268             | 0.0096             | 0.0041             | 0.0137             |
| 2                | 0.0660          | 0.1634          | 0.0331          | 0.0122          | 0.0938          | 0.0111          | 0.3358          | 0.1684          | 0.0066             | 0.0202             | 0.0042             | 0.0033             | 0.0175             |
| 3                | 0.0528          | 0.0718          | 0.0270          | 0.0142          | 0.0797          | 0.0144          | 0.5344          | 0.2733          | 0.0045             | 0.0078             | 0.0051             | 0.0040             | 0.0190             |
| 4                | 0.1378          | 0.2753          | 0.1216          | 0.0158          | 0.0686          | 0.0422          | 0.3473          | 0.3064          | 0.0144             | 0.0353             | 0.0366             | 0.0037             | 0.0279             |
| 5                | 0.0519          | 0.0644          | 0.0196          | 0.0138          | 0.0967          | 0.0121          | 0.6188          | 0.2333          | 0.0041             | 0.0083             | 0.0041             | 0.0044             | 0.0167             |
| 6                | 0.0154          | 0.0541          | 0.0902          | 0.0353          | 0.1051          | 0.0096          | 0.1068          | 0.6251          | 0.0048             | 0.0366             | 0.0583             | 0.0236             | 0.0235             |
| 7                | 0.0867          | 0.0647          | 0.0220          | 0.0185          | 0.1198          | 0.0220          | 1.0003          | 0.2537          | 0.0035             | 0.0037             | 0.0015             | 0.0017             | 0.0098             |
| 8                | 0.0384          | 0.2028          | 0.0446          | 0.0075          | 0.0410          | 0.0069          | 0.1554          | 0.1803          | 0.0059             | 0.0334             | 0.0104             | 0.0059             | 0.0118             |
| 9                | 0.0293          | 0.0758          | 0.0390          | 0.0147          | 0.0494          | 0.0099          | 0.2551          | 0.3397          | 0.0031             | 0.0166             | 0.0056             | 0.0095             | 0.0112             |
| 10               | 0.0439          | 0.0693          | 0.0724          | 0.0248          | 0.0793          | 0.0224          | 0.3098          | 0.5109          | 0.0074             | 0.0200             | 0.0191             | 0.0077             | 0.0252             |
| 11               | 0.0821          | 0.1892          | 0.0421          | 0.0130          | 0.0359          | 0.0149          | 0.3549          | 0.1820          | 0.0061             | 0.0178             | 0.0035             | 0.0015             | 0.0060             |
| 12               | 0.1182          | 0.2050          | 0.0520          | 0.0240          | 0.0730          | 0.0239          | 0.4599          | 0.2023          | 0.0156             | 0.0374             | 0.0074             | 0.0028             | 0.0226             |
| 13               | 0.0903          | 0.0934          | 0.0495          | 0.0208          | 0.0852          | 0.0313          | 0.6319          | 0.3464          | 0.0031             | 0.0045             | 0.0029             | 0.0017             | 0.0091             |
| 14               | 0.0225          | 0.0693          | 0.0412          | 0.0183          | 0.0690          | 0.0084          | 0.2035          | 0.3729          | 0.0040             | 0.0268             | 0.0129             | 0.0106             | 0.0159             |
| 15               | 0.0712          | 0.2153          | 0.0204          | 0.0153          | 0.1252          | 0.0062          | 0.3023          | 0.0866          | 0.0100             | 0.0307             | 0.0025             | 0.0052             | 0.0189             |
| 16               | 0.1089          | 0.1930          | 0.1071          | 0.0384          | 0.1767          | 0.0389          | 0.3630          | 0.3569          | 0.0071             | 0.0176             | 0.0105             | 0.0038             | 0.0196             |
| 17               | 0.1028          | 0.1545          | 0.0256          | 0.0051          | 0.0702          | 0.0146          | 0.5707          | 0.1421          | 0.0089             | 0.0171             | 0.0027             | 0.0255             | 0.0168             |
| 18               | 0.0285          | 0.1116          | 0.0514          | 0.0137          | 0.1091          | 0.0090          | 0.1750          | 0.3153          | 0.0085             | 0.0439             | 0.0172             | 0.0078             | 0.0200             |
| 19               | 0.0298          | 0.1148          | 0.0832          | 0.0269          | 0.0787          | 0.0125          | 0.1506          | 0.4202          | 0.0051             | 0.0319             | 0.0124             | 0.0137             | 0.0130             |
| 20               | 0.0169          | 0.0464          | 0.0317          | 0.0171          | 0.0653          | 0.0069          | 0.2166          | 0.4059          | 0.0021             | 0.0113             | 0.0089             | 0.0044             | 0.0100             |
| 21               | 0.0092          | 0.0331          | 0.0915          | 0.0847          | 0.4592          | 0.0068          | 0.0741          | 0.7343          | 0.0047             | 0.0230             | 0.1250             | 0.1348             | 0.0583             |
| <b>Median</b>    | 0.0519          | 0.1116          | 0.0446          | 0.0158          | 0.0793          | 0.0125          | 0.3098          | 0.3064          | 0.0059             | 0.0202             | 0.0089             | 0.0044             | 0.0168             |
| <b>Mean ± SD</b> | 0.0597 ± 0.0371 | 0.1241 ± 0.0686 | 0.0530 ± 0.0298 | 0.0214 ± 0.0166 | 0.1022 ± 0.0877 | 0.0161 ± 0.0104 | 0.3542 ± 0.2204 | 0.3198 ± 0.1586 | 0.0065 ± 0.0035    | 0.0224 ± 0.0116    | 0.0172 ± 0.0280    | 0.0133 ± 0.0286    | 0.0184 ± 0.0108    |

\* SEE = standard error of the estimate.

**Supplementary Table S6.** FLT kinetic parameters at 6 weeks after the start of therapy.

| Patient No.      | K <sub>1</sub>  | k <sub>2</sub>  | k <sub>3</sub>  | k <sub>4</sub>  | V <sub>b</sub>  | K <sub>i</sub>  | V <sub>d</sub>  | PF              | SEE-K <sub>1</sub> | SEE-k <sub>2</sub> | SEE-k <sub>3</sub> | SEE-k <sub>4</sub> | SEE-V <sub>b</sub> |
|------------------|-----------------|-----------------|-----------------|-----------------|-----------------|-----------------|-----------------|-----------------|--------------------|--------------------|--------------------|--------------------|--------------------|
| 1                | 0.0270          | 0.0532          | 0.0221          | 0.0175          | 0.0827          | 0.0079          | 0.3591          | 0.2935          | 0.0021             | 0.0062             | 0.0047             | 0.0035             | 0.0146             |
| 2                | 0.0872          | 0.0730          | 0.0197          | 0.0142          | 0.1014          | 0.0185          | 0.9406          | 0.2125          | 0.0044             | 0.0047             | 0.0021             | 1.0482             | 0.0184             |
| 3                | 0.0317          | 0.0442          | 0.0650          | 0.0176          | 0.1081          | 0.0188          | 0.2900          | 0.5952          | 0.0027             | 0.0059             | 0.0115             | 0.0057             | 0.0183             |
| 4                | 0.0988          | 0.1119          | 0.0823          | 0.0151          | 0.1512          | 0.0419          | 0.5089          | 0.4238          | 0.0066             | 0.0078             | 0.0057             | 0.0020             | 0.0241             |
| 5                | 0.0428          | 0.0531          | 0.0319          | 0.0170          | 0.0729          | 0.0161          | 0.5031          | 0.3753          | 0.0043             | 0.0063             | 0.0101             | 0.0056             | 0.0237             |
| 6                | 0.0329          | 0.0377          | 0.0295          | 0.0147          | 0.0526          | 0.0145          | 0.4895          | 0.4390          | 0.0027             | 0.0048             | 0.0068             | 0.0062             | 0.0129             |
| 7                | 0.0648          | 0.0695          | 0.0168          | 0.0091          | 0.0473          | 0.0126          | 0.7515          | 0.1947          | 0.0048             | 0.0105             | 0.0042             | 0.0017             | 0.0100             |
| 8                | 0.0320          | 0.1496          | 0.0762          | 0.0287          | 0.1073          | 0.0108          | 0.1415          | 0.3375          | 0.0079             | 0.0492             | 0.0210             | 0.0120             | 0.0252             |
| 9                | 0.0331          | 0.0262          | 0.0085          | 0.0171          | 0.1407          | 0.0081          | 0.9530          | 0.2450          | 0.0021             | 0.0027             | 0.0019             | 0.0534             | 0.0230             |
| 10               | 0.0497          | 0.0582          | 0.0528          | 0.0254          | 0.0769          | 0.0236          | 0.4481          | 0.4757          | 0.0053             | 0.0109             | 0.0083             | 0.0113             | 0.0213             |
| 11               | 0.0844          | 0.1261          | 0.0308          | 0.0093          | 0.0555          | 0.0166          | 0.5378          | 0.1963          | 0.0056             | 0.0130             | 0.0040             | 0.0012             | 0.0109             |
| 12               | 0.0789          | 0.1296          | 0.0639          | 0.0196          | 0.1105          | 0.0261          | 0.4077          | 0.3302          | 0.0027             | 0.0053             | 0.0024             | 0.0008             | 0.0059             |
| 13               | 0.1057          | 0.1486          | 0.1299          | 0.0316          | 0.0971          | 0.0493          | 0.3794          | 0.4664          | 0.0089             | 0.0274             | 0.0119             | 0.0056             | 0.0139             |
| 14               | 0.0496          | 0.0740          | 0.0366          | 0.0116          | 0.0447          | 0.0164          | 0.4489          | 0.3309          | 0.0042             | 0.0081             | 0.0052             | 0.0038             | 0.0105             |
| 15               | 0.0565          | 0.0879          | 0.0183          | 0.0097          | 0.0758          | 0.0098          | 0.5324          | 0.1723          | 0.0065             | 0.0133             | 0.0034             | 0.0182             | 0.0200             |
| 16               | 0.1839          | 0.2548          | 0.0596          | 0.0148          | 0.1858          | 0.0348          | 0.5848          | 0.1896          | 0.0120             | 0.0276             | 0.0085             | 0.0020             | 0.0216             |
| 17               | 0.0873          | 0.2480          | 0.0599          | 0.0076          | 0.3185          | 0.0170          | 0.2836          | 0.1945          | 0.0101             | 0.0222             | 0.0065             | 0.9195             | 0.0273             |
| 18               | 0.0469          | 0.0668          | 0.0365          | 0.0163          | 0.0850          | 0.0166          | 0.4532          | 0.3533          | 0.0066             | 0.0164             | 0.0057             | 0.0075             | 0.0169             |
| 19               | 0.0413          | 0.1499          | 0.0359          | 0.0273          | 0.0977          | 0.0080          | 0.2226          | 0.1932          | 0.0050             | 0.0231             | 0.0069             | 0.0073             | 0.0134             |
| 20               | 0.0323          | 0.1196          | 0.0411          | 0.0163          | 0.0364          | 0.0083          | 0.2011          | 0.2558          | 0.0041             | 0.0183             | 0.0128             | 0.0036             | 0.0109             |
| 21               | 0.0110          | 0.0242          | 0.1051          | 0.0985          | 0.1446          | 0.0089          | 0.0850          | 0.8128          | 0.0025             | 0.0150             | 0.0732             | 0.0677             | 0.0383             |
| <b>Median</b>    | 0.0496          | 0.0740          | 0.0366          | 0.0163          | 0.0971          | 0.0164          | 0.4489          | 0.3302          | 0.0048             | 0.0109             | 0.0065             | 0.0057             | 0.0183             |
| <b>Mean ± SD</b> | 0.0608 ± 0.0386 | 0.1003 ± 0.0645 | 0.0487 ± 0.0308 | 0.0209 ± 0.0189 | 0.1044 ± 0.0623 | 0.0183 ± 0.0114 | 0.4534 ± 0.2275 | 0.3375 ± 0.1599 | 0.0053 ± 0.0027    | 0.0142 ± 0.0110    | 0.0103 ± 0.0151    | 0.1041 ± 0.2937    | 0.0181 ± 0.0075    |

\* SEE = standard error of the estimate.

Supplementary Table S7. FDOPA kinetic parameters at the baseline study.

15

| Patient No.      | K <sub>1</sub>  | k <sub>2</sub>  | k <sub>3</sub>  | k <sub>4</sub>  | V <sub>b</sub>  | K <sub>i</sub>  | V <sub>d</sub>  | SF              | SEE-K <sub>1</sub> | SEE-k <sub>2</sub> | SEE-k <sub>3</sub> | SEE-k <sub>4</sub> | SEE-V <sub>b</sub> |
|------------------|-----------------|-----------------|-----------------|-----------------|-----------------|-----------------|-----------------|-----------------|--------------------|--------------------|--------------------|--------------------|--------------------|
| 1                | 0.1440          | 0.1801          | 0.0397          | 0.0097          | 0.0883          | 0.0260          | 0.6550          | 0.1806          | 0.0186             | 0.0301             | 0.0055             | 0.0040             | 0.0280             |
| 2                | 0.1884          | 0.4193          | 0.0740          | 0.0011          | 0.0562          | 0.0283          | 0.3820          | 0.1500          | 0.0189             | 0.0314             | 0.0080             | 0.0693             | 0.0188             |
| 3                | 0.1682          | 0.0794          | 0.0300          | 0.0264          | 0.1146          | 0.0462          | 1.5371          | 0.2742          | 0.0060             | 0.0059             | 0.0025             | 0.5300             | 0.0111             |
| 4                | 0.1913          | 0.1630          | 0.0692          | 0.0143          | 0.1312          | 0.0570          | 0.8238          | 0.2980          | 0.0152             | 0.0250             | 0.0064             | 0.0030             | 0.0217             |
| 5                | 0.1006          | 0.1211          | 0.0588          | 0.0216          | 0.0849          | 0.0329          | 0.5594          | 0.3268          | 0.0131             | 0.0348             | 0.0146             | 0.0050             | 0.0218             |
| 6                | 0.1623          | 0.1610          | 0.0501          | 0.0179          | 0.0505          | 0.0386          | 0.7690          | 0.2373          | 0.0177             | 0.0286             | 0.0062             | 0.0099             | 0.0242             |
| 7                | 0.2059          | 0.1558          | 0.0343          | 0.0129          | 0.0865          | 0.0372          | 1.0831          | 0.1804          | 0.0323             | 0.0400             | 0.0071             | 0.0058             | 0.0461             |
| 8                | 0.2160          | 0.3544          | 0.1118          | 0.0360          | 0.0805          | 0.0518          | 0.4633          | 0.2398          | 0.0213             | 0.0419             | 0.0113             | 0.0079             | 0.0206             |
| 9                | 0.1671          | 0.1943          | 0.0776          | 0.0230          | 0.1083          | 0.0477          | 0.6147          | 0.2854          | 0.0149             | 0.0225             | 0.0055             | 0.0051             | 0.0257             |
| 10               | 0.1114          | 0.0826          | 0.0278          | 0.0146          | 0.0602          | 0.0280          | 1.0101          | 0.2518          | 0.0070             | 0.0082             | 0.0048             | 0.0058             | 0.0179             |
| 11               | 0.1737          | 0.1592          | 0.0513          | 0.0192          | 0.1247          | 0.0423          | 0.8249          | 0.2437          | 0.0107             | 0.0155             | 0.0039             | 0.0034             | 0.0135             |
| 12               | 0.1683          | 0.2274          | 0.0458          | 0.0058          | 0.0962          | 0.0282          | 0.6158          | 0.1676          | 0.0134             | 0.0197             | 0.0043             | 0.0258             | 0.0208             |
| 13               | 0.0686          | 0.1020          | 0.0752          | 0.0178          | 0.0414          | 0.0291          | 0.3871          | 0.4244          | 0.0080             | 0.0281             | 0.0148             | 0.0044             | 0.0107             |
| 14               | 0.1703          | 0.1169          | 0.0321          | 0.0088          | 0.0837          | 0.0367          | 1.1430          | 0.2154          | 0.0086             | 0.0103             | 0.0028             | 0.6135             | 0.0142             |
| 15               | 0.1937          | 0.1629          | 0.0462          | 0.0054          | 0.0610          | 0.0428          | 0.9265          | 0.2209          | 0.0063             | 0.0059             | 0.0029             | 0.0010             | 0.0105             |
| 16               | 0.1454          | 0.1607          | 0.0635          | 0.0407          | 0.1026          | 0.0412          | 0.6487          | 0.2832          | 0.0104             | 0.0160             | 0.0088             | 0.0121             | 0.0227             |
| 17               | 0.2680          | 0.2663          | 0.0706          | 0.0324          | 0.1005          | 0.0562          | 0.7955          | 0.2096          | 0.0329             | 0.0360             | 0.0135             | 0.0096             | 0.0392             |
| 18               | 0.0971          | 0.0996          | 0.0402          | 0.0235          | 0.0918          | 0.0279          | 0.6946          | 0.2876          | 0.0075             | 0.0135             | 0.0069             | 0.0148             | 0.0147             |
| 19               | 0.0978          | 0.0968          | 0.0135          | 0.0045          | 0.0435          | 0.0119          | 0.8864          | 0.1224          | 0.0073             | 0.0131             | 0.0036             | 0.4709             | 0.0135             |
| 20               | 0.1150          | 0.1374          | 0.0509          | 0.0068          | 0.0455          | 0.0311          | 0.6105          | 0.2703          | 0.0146             | 0.0359             | 0.0101             | 0.0029             | 0.0177             |
| 21               | 0.0922          | 0.1395          | 0.0297          | 0.0053          | 0.0536          | 0.0162          | 0.5446          | 0.1755          | 0.0078             | 0.0192             | 0.0030             | 0.5951             | 0.0088             |
| <b>Median</b>    | 0.1671          | 0.1592          | 0.0501          | 0.0146          | 0.0849          | 0.0367          | 0.6946          | 0.2398          | 0.0131             | 0.0225             | 0.0062             | 0.0079             | 0.0188             |
| <b>Mean ± SD</b> | 0.1545 ± 0.0494 | 0.1705 ± 0.0860 | 0.0520 ± 0.0226 | 0.0166 ± 0.0110 | 0.0812 ± 0.0274 | 0.0361 ± 0.0120 | 0.7607 ± 0.2756 | 0.2402 ± 0.0684 | 0.0139 ± 0.0077    | 0.0229 ± 0.0114    | 0.0070 ± 0.0039    | 0.1143 ± 0.2197    | 0.0201 ± 0.0093    |

\* SEE = standard error of the estimate.

**Supplementary Table S8.** FDOPA kinetic parameters at 2 weeks after the start of therapy.

| Patient No.      | K <sub>1</sub>  | k <sub>2</sub>  | k <sub>3</sub>  | k <sub>4</sub>  | V <sub>b</sub>  | K <sub>i</sub>  | V <sub>d</sub>  | SF              | SEE-K <sub>1</sub> | SEE-k <sub>2</sub> | SEE-k <sub>3</sub> | SEE-k <sub>4</sub> | SEE-V <sub>b</sub> |
|------------------|-----------------|-----------------|-----------------|-----------------|-----------------|-----------------|-----------------|-----------------|--------------------|--------------------|--------------------|--------------------|--------------------|
| 1                | 0.1015          | 0.2318          | 0.0393          | 0.0005          | 0.0463          | 0.0147          | 0.3744          | 0.1450          | 0.0107             | 0.0267             | 0.0035             | 0.0286             | 0.0130             |
| 2                | 0.1065          | 0.1322          | 0.0612          | 0.0209          | 0.0746          | 0.0337          | 0.5507          | 0.3164          | 0.0103             | 0.0174             | 0.0100             | 0.0053             | 0.0216             |
| 3                | 0.1494          | 0.0830          | 0.0206          | 0.0107          | 0.0935          | 0.0297          | 1.4417          | 0.1988          | 0.0082             | 0.0119             | 0.0060             | 0.0040             | 0.0153             |
| 4                | 0.2401          | 0.2869          | 0.1156          | 0.0187          | 0.1778          | 0.0690          | 0.5965          | 0.2872          | 0.0317             | 0.0412             | 0.0145             | 0.0048             | 0.0337             |
| 5                | 0.0909          | 0.0893          | 0.0388          | 0.0151          | 0.0707          | 0.0275          | 0.7100          | 0.3029          | 0.0094             | 0.0281             | 0.0153             | 0.0090             | 0.0126             |
| 6                | 0.0944          | 0.0752          | 0.0144          | 0.0089          | 0.0495          | 0.0151          | 1.0545          | 0.1607          | 0.0036             | 0.0044             | 0.0024             | 0.4948             | 0.0101             |
| 7                | 0.1382          | 0.1981          | 0.1186          | 0.0313          | 0.0590          | 0.0517          | 0.4364          | 0.3745          | 0.0097             | 0.0291             | 0.0151             | 0.0053             | 0.0088             |
| 8                | 0.1458          | 0.1741          | 0.1160          | 0.0315          | 0.0971          | 0.0583          | 0.5027          | 0.3999          | 0.0165             | 0.0347             | 0.0126             | 0.0155             | 0.0183             |
| 9                | 0.1632          | 0.1822          | 0.0586          | 0.0168          | 0.0973          | 0.0397          | 0.6775          | 0.2434          | 0.0125             | 0.0209             | 0.0038             | 0.0045             | 0.0188             |
| 10               | 0.0924          | 0.1329          | 0.0360          | 0.0152          | 0.0669          | 0.0197          | 0.5471          | 0.2131          | 0.0026             | 0.0059             | 0.0019             | 0.0262             | 0.0065             |
| 11               | 0.1102          | 0.1279          | 0.0494          | 0.0079          | 0.0643          | 0.0307          | 0.6220          | 0.2786          | 0.0066             | 0.0143             | 0.0048             | 0.1239             | 0.0131             |
| 12               | 0.1451          | 0.1319          | 0.0554          | 0.0350          | 0.0612          | 0.0429          | 0.7745          | 0.2958          | 0.0085             | 0.0151             | 0.0029             | 0.0081             | 0.0068             |
| 13               | 0.1018          | 0.1031          | 0.0759          | 0.0229          | 0.0438          | 0.0432          | 0.5687          | 0.4240          | 0.0037             | 0.0087             | 0.0040             | 0.0060             | 0.0039             |
| 14               | 0.1420          | 0.0736          | 0.0479          | 0.0493          | 0.1144          | 0.0559          | 1.1687          | 0.3942          | 0.0111             | 0.0127             | 0.0156             | 0.0141             | 0.0356             |
| 15               | 0.1366          | 0.1970          | 0.1161          | 0.0274          | 0.1031          | 0.0506          | 0.4364          | 0.3708          | 0.0125             | 0.0358             | 0.0090             | 0.0104             | 0.0183             |
| 16               | 0.1336          | 0.1559          | 0.0600          | 0.0333          | 0.1237          | 0.0371          | 0.6186          | 0.2779          | 0.0161             | 0.0338             | 0.0157             | 0.0158             | 0.0261             |
| 17               | 0.1911          | 0.2443          | 0.0771          | 0.0306          | 0.1302          | 0.0459          | 0.5947          | 0.2399          | 0.0120             | 0.0182             | 0.0129             | 0.0091             | 0.0183             |
| 18               | 0.1036          | 0.0878          | 0.0309          | 0.0060          | 0.0971          | 0.0270          | 0.8731          | 0.2603          | 0.0086             | 0.0166             | 0.0089             | 0.0012             | 0.0203             |
| 19               | 0.0896          | 0.1231          | 0.0342          | 0.0160          | 0.0842          | 0.0195          | 0.5695          | 0.2174          | 0.0070             | 0.0137             | 0.0051             | 0.0042             | 0.0139             |
| 20               | 0.1358          | 0.1811          | 0.1142          | 0.0156          | 0.0891          | 0.0525          | 0.4600          | 0.3867          | 0.0089             | 0.0183             | 0.0069             | 0.0033             | 0.0128             |
| 21               | 0.0943          | 0.1347          | 0.0240          | 0.0081          | 0.0321          | 0.0143          | 0.5940          | 0.1512          | 0.0039             | 0.0092             | 0.0021             | 0.3059             | 0.0046             |
| <b>Median</b>    | 0.1336          | 0.1329          | 0.0554          | 0.0168          | 0.0842          | 0.0371          | 0.5947          | 0.2786          | 0.0094             | 0.0174             | 0.0069             | 0.0090             | 0.0139             |
| <b>Mean ± SD</b> | 0.1289 ± 0.0377 | 0.1498 ± 0.0590 | 0.0621 ± 0.0349 | 0.0201 ± 0.0120 | 0.0846 ± 0.0342 | 0.0371 ± 0.0159 | 0.6748 ± 0.2632 | 0.2828 ± 0.0855 | 0.0102 ± 0.0062    | 0.0198 ± 0.0105    | 0.0082 ± 0.0051    | 0.0524 ± 0.1222    | 0.0158 ± 0.0085    |

\* SEE = standard error of the estimate.



**Supplementary Table S9.** FDOPA kinetic parameters at 6 weeks after the start of therapy.

| Patient No.      | K <sub>1</sub>  | k <sub>2</sub>  | k <sub>3</sub>  | k <sub>4</sub>  | V <sub>b</sub>  | K <sub>i</sub>  | V <sub>d</sub>  | SF              | SEE-K <sub>1</sub> | SEE-k <sub>2</sub> | SEE-k <sub>3</sub> | SEE-k <sub>4</sub> | SEE-V <sub>b</sub> |
|------------------|-----------------|-----------------|-----------------|-----------------|-----------------|-----------------|-----------------|-----------------|--------------------|--------------------|--------------------|--------------------|--------------------|
| 1                | 0.1875          | 0.4863          | 0.0462          | 0.0100          | 0.0501          | 0.0163          | 0.3522          | 0.0868          | 0.0358             | 0.0937             | 0.0053             | 0.0047             | 0.0225             |
| 2                | 0.1782          | 0.2850          | 0.1570          | 0.0243          | 0.0702          | 0.0633          | 0.4031          | 0.3552          | 0.0151             | 0.0238             | 0.0148             | 0.0026             | 0.0188             |
| 3                | 0.1288          | 0.0593          | 0.0099          | 0.0148          | 0.1019          | 0.0185          | 1.8595          | 0.1431          | 0.0087             | 0.0067             | 0.0040             | 1.0581             | 0.0288             |
| 4                | 0.1773          | 0.1783          | 0.1594          | 0.0527          | 0.2415          | 0.0837          | 0.5250          | 0.4720          | 0.0214             | 0.0294             | 0.0294             | 0.0245             | 0.0376             |
| 5                | 0.0826          | 0.0512          | 0.0217          | 0.0591          | 0.0942          | 0.0246          | 1.1324          | 0.2977          | 0.0056             | 0.0068             | 0.0063             | 6.2455             | 0.0165             |
| 6                | 0.1348          | 0.1015          | 0.0579          | 0.0241          | 0.0824          | 0.0489          | 0.8457          | 0.3632          | 0.0103             | 0.0126             | 0.0072             | 0.0085             | 0.0300             |
| 7                | 0.0877          | 0.1008          | 0.0573          | 0.0255          | 0.0772          | 0.0318          | 0.5545          | 0.3624          | 0.0054             | 0.0124             | 0.0060             | 0.0058             | 0.0111             |
| 8                | 0.1244          | 0.0723          | 0.0320          | 0.0087          | 0.0328          | 0.0382          | 1.1922          | 0.3068          | 0.0101             | 0.0122             | 0.0040             | 0.0398             | 0.0217             |
| 9                | 0.1340          | 0.2087          | 0.1312          | 0.0421          | 0.1127          | 0.0517          | 0.3942          | 0.3860          | 0.0128             | 0.0324             | 0.0091             | 0.0099             | 0.0162             |
| 10               | 0.0687          | 0.0436          | 0.0158          | 0.0221          | 0.1032          | 0.0183          | 1.1568          | 0.2660          | 0.0063             | 0.0091             | 0.0063             | 0.0885             | 0.0210             |
| 11               | 0.1539          | 0.1943          | 0.0898          | 0.0230          | 0.1079          | 0.0486          | 0.5416          | 0.3161          | 0.0063             | 0.0142             | 0.0101             | 0.0031             | 0.0127             |
| 12               | 0.1271          | 0.0937          | 0.0256          | 0.0130          | 0.0944          | 0.0273          | 1.0659          | 0.2146          | 0.0082             | 0.0107             | 0.0039             | 0.0065             | 0.0218             |
| 13               | 0.0898          | 0.0397          | 0.0052          | 0.0198          | 0.0938          | 0.0104          | 2.0001          | 0.1158          | 0.0052             | 0.0039             | 0.0873             | 1.6339             | 0.0225             |
| 14               | 0.1498          | 0.0474          | 0.0979          | 0.1246          | 0.1966          | 0.1009          | 1.0311          | 0.6738          | 0.0109             | 0.0130             | 0.0322             | 0.0349             | 0.0322             |
| 15               | 0.1226          | 0.1233          | 0.0496          | 0.0152          | 0.0675          | 0.0352          | 0.7090          | 0.2869          | 0.0082             | 0.0221             | 0.0251             | 0.0088             | 0.0149             |
| 16               | 0.1592          | 0.1629          | 0.0486          | 0.0094          | 0.1163          | 0.0366          | 0.7528          | 0.2298          | 0.0155             | 0.0263             | 0.0054             | 0.0058             | 0.0234             |
| 17               | 0.1179          | 0.1336          | 0.0676          | 0.0193          | 0.1027          | 0.0396          | 0.5861          | 0.3360          | 0.0097             | 0.0173             | 0.0067             | 0.0071             | 0.0211             |
| 18               | 0.0986          | 0.0945          | 0.0555          | 0.0312          | 0.0789          | 0.0365          | 0.6574          | 0.3700          | 0.0051             | 0.0085             | 0.0074             | 0.0045             | 0.0108             |
| 19               | 0.0829          | 0.1327          | 0.0457          | 0.0139          | 0.0631          | 0.0212          | 0.4644          | 0.2562          | 0.0079             | 0.0216             | 0.0059             | 1.2961             | 0.0138             |
| 20               | 0.1433          | 0.1257          | 0.0518          | 0.0034          | 0.0190          | 0.0418          | 0.8071          | 0.2918          | 0.0141             | 0.0185             | 0.0068             | 0.3991             | 0.0288             |
| 21               | 0.0693          | 0.0889          | 0.0118          | 0.0091          | 0.0491          | 0.0081          | 0.6876          | 0.1172          | 0.0036             | 0.0044             | 0.0022             | 1.0289             | 0.0077             |
| <b>Median</b>    | 0.1271          | 0.1015          | 0.0496          | 0.0198          | 0.0938          | 0.0365          | 0.7090          | 0.2977          | 0.0087             | 0.0130             | 0.0067             | 0.0099             | 0.0211             |
| <b>Mean ± SD</b> | 0.1247 ± 0.0359 | 0.1345 ± 0.1018 | 0.0589 ± 0.0451 | 0.0269 ± 0.0265 | 0.0931 ± 0.0499 | 0.0382 ± 0.0231 | 0.8437 ± 0.4454 | 0.2975 ± 0.1317 | 0.0108 ± 0.0072    | 0.0190 ± 0.0189    | 0.0136 ± 0.0189    | 0.5675 ± 1.3954    | 0.0207 ± 0.0077    |

\* SEE = standard error of the estimate.

**Supplementary Table S10.** Standardized uptake values of FLT at each of the three study time points.

| Patient No.      | FLT SUV-early |             |             | FLT SUV-late |             |             |
|------------------|---------------|-------------|-------------|--------------|-------------|-------------|
|                  | Baseline      | 2 wks       | 6 wks       | Baseline     | 2 wks       | 6 wks       |
| 1                | 0.44          | 0.64        | 0.37        | 0.44         | 0.61        | 0.37        |
| 2                | 0.53          | 0.62        | 1.22        | 0.56         | 0.47        | 1.05        |
| 3                | 0.75          | 0.50        | 0.51        | 0.85         | 0.45        | 0.58        |
| 4                | 1.64          | 0.85        | 1.29        | 1.91         | 1.15        | 1.64        |
| 5                | 0.72          | 0.51        | 0.50        | 0.85         | 0.51        | 0.55        |
| 6                | 0.82          | 0.44        | 0.69        | 0.67         | 0.44        | 0.78        |
| 7                | 2.56          | 1.79        | 1.23        | 2.57         | 1.58        | 1.07        |
| 8                | 0.78          | 0.29        | 0.44        | 0.66         | 0.33        | 0.42        |
| 9                | 1.33          | 0.50        | 0.74        | 1.30         | 0.46        | 0.76        |
| 10               | 1.38          | 0.65        | 0.77        | 1.41         | 0.68        | 0.85        |
| 11               | 0.86          | 0.84        | 1.44        | 0.79         | 0.78        | 1.48        |
| 12               | 1.72          | 0.96        | 0.94        | 1.57         | 0.84        | 0.99        |
| 13               | 1.71          | 1.35        | 1.18        | 1.74         | 1.25        | 1.40        |
| 14               | 1.06          | 0.62        | 0.61        | 0.90         | 0.53        | 0.61        |
| 15               | 0.74          | 0.70        | 0.67        | 0.68         | 0.51        | 0.55        |
| 16               | 1.37          | 1.02        | 1.08        | 1.19         | 0.90        | 1.07        |
| 17               | 1.41          | 1.30        | 1.00        | 1.13         | 1.08        | 1.07        |
| 18               | 0.18          | 0.48        | 0.65        | 0.31         | 0.49        | 0.64        |
| 19               | 0.44          | 0.27        | 0.40        | 0.40         | 0.26        | 0.29        |
| 20               | 1.63          | 0.55        | 0.65        | 1.52         | 0.57        | 0.53        |
| 21               | 0.51          | 0.56        | 0.30        | 0.52         | 0.41        | 0.33        |
| <b>Median</b>    | 0.86          | 0.62        | 0.69        | 0.85         | 0.53        | 0.76        |
| <b>Mean ± SD</b> | 1.07 ± 0.58   | 0.74 ± 0.37 | 0.79 ± 0.34 | 1.05 ± 0.58  | 0.68 ± 0.34 | 0.81 ± 0.38 |

**Supplementary Table S11.** FDOPA standardized uptake values at each of the three study time points.

| Patient No.      | FDOPA SUV-early |             |             | FDOPA SUV-late |             |             |
|------------------|-----------------|-------------|-------------|----------------|-------------|-------------|
|                  | Baseline        | 2 wks       | 6 wks       | Baseline       | 2 wks       | 6 wks       |
| 1                | 1.85            | 1.38        | 1.05        | 1.46           | 1.25        | 0.82        |
| 2                | 1.44            | 1.81        | 2.03        | 1.39           | 1.64        | 2.14        |
| 3                | 2.43            | 2.11        | 2.27        | 2.28           | 1.78        | 1.72        |
| 4                | 3.16            | 3.12        | 3.43        | 3.13           | 3.11        | 3.38        |
| 5                | 1.15            | 1.34        | 1.69        | 1.04           | 1.15        | 1.51        |
| 6                | 2.38            | 1.83        | 2.85        | 2.03           | 1.44        | 2.64        |
| 7                | 3.51            | 2.25        | 2.00        | 2.84           | 2.16        | 1.85        |
| 8                | 2.12            | 2.50        | 1.85        | 1.85           | 2.34        | 1.68        |
| 9                | 2.46            | 2.30        | 2.83        | 2.33           | 2.02        | 2.48        |
| 10               | 2.34            | 1.50        | 1.95        | 1.93           | 1.20        | 1.69        |
| 11               | 3.07            | 2.73        | 2.69        | 2.45           | 2.38        | 2.47        |
| 12               | 2.46            | 2.76        | 2.89        | 2.03           | 2.36        | 2.35        |
| 13               | 1.76            | 2.35        | 2.16        | 1.77           | 2.25        | 1.83        |
| 14               | 2.70            | 3.09        | 2.99        | 2.28           | 2.80        | 2.97        |
| 15               | 2.17            | 2.03        | 1.99        | 2.01           | 1.96        | 1.87        |
| 16               | 1.58            | 1.82        | 2.37        | 1.23           | 1.52        | 2.07        |
| 17               | 4.03            | 3.05        | 3.13        | 3.30           | 2.57        | 2.80        |
| 18               | 2.02            | 2.73        | 2.57        | 1.74           | 2.42        | 2.29        |
| 19               | 0.89            | 1.20        | 1.22        | 0.64           | 1.00        | 1.05        |
| 20               | 2.64            | 3.68        | 4.05        | 2.50           | 3.81        | 4.06        |
| 21               | 1.55            | 1.35        | 1.37        | 1.21           | 1.03        | 0.98        |
| <b>Median</b>    | 2.34            | 2.25        | 2.27        | 2.01           | 2.02        | 2.07        |
| <b>Mean ± SD</b> | 2.27 ± 0.77     | 2.24 ± 0.69 | 2.35 ± 0.75 | 1.97 ± 0.68    | 2.01 ± 0.73 | 2.13 ± 0.79 |

**Supplementary Table S12.** FDOPA tumor-to-striatum standardized uptake value ratios (early and late) at each of the three study time points.

| Patient No.      | FDOPA Tumor-to-Striatum SUV Ratios (early) |             |             | FDOPA Tumor-to-Striatum SUV Ratios (late) |             |             |
|------------------|--------------------------------------------|-------------|-------------|-------------------------------------------|-------------|-------------|
|                  | Baseline                                   | 2 wks       | 6 wks       | Baseline                                  | 2 wks       | 6 wks       |
| 1                | 1.38                                       | 0.76        | 0.60        | 1.02                                      | 0.67        | 0.47        |
| 2                | 0.92                                       | 1.04        | 1.68        | 0.89                                      | 0.97        | 1.61        |
| 3                | 1.41                                       | 1.90        | 1.98        | 1.25                                      | 1.53        | 1.38        |
| 4                | 1.49                                       | 1.45        | 1.34        | 1.33                                      | 1.39        | 1.29        |
| 5                | 1.02                                       | 1.12        | 1.26        | 0.90                                      | 0.93        | 1.06        |
| 6                | 1.36                                       | 1.18        | 1.57        | 1.01                                      | 0.90        | 1.34        |
| 7                | 1.29                                       | 1.32        | 1.13        | 0.98                                      | 1.20        | 0.97        |
| 8                | 1.16                                       | 1.46        | 1.20        | 0.96                                      | 1.30        | 1.09        |
| 9                | 1.17                                       | 1.14        | 1.07        | 1.09                                      | 0.95        | 0.97        |
| 10               | 1.05                                       | 0.94        | 1.00        | 0.82                                      | 0.73        | 0.86        |
| 11               | 2.29                                       | 1.73        | 1.53        | 1.77                                      | 1.46        | 1.35        |
| 12               | 1.82                                       | 1.59        | 1.85        | 1.47                                      | 1.34        | 1.41        |
| 13               | 0.97                                       | 1.52        | 1.22        | 0.93                                      | 1.38        | 0.96        |
| 14               | 1.27                                       | 1.29        | 1.35        | 1.05                                      | 1.15        | 1.28        |
| 15               | 1.39                                       | 1.07        | 1.00        | 1.20                                      | 0.97        | 0.86        |
| 16               | 2.00                                       | 1.87        | 2.18        | 1.51                                      | 1.51        | 1.79        |
| 17               | 1.63                                       | 1.38        | 1.49        | 1.32                                      | 1.18        | 1.36        |
| 18               | 1.09                                       | 1.14        | 1.11        | 0.90                                      | 0.96        | 0.99        |
| 19               | 1.65                                       | 0.86        | 1.06        | 1.17                                      | 0.65        | 0.90        |
| 20               | 1.32                                       | 1.32        | 1.19        | 1.22                                      | 1.31        | 1.10        |
| 21               | 1.02                                       | 0.95        | 0.96        | 0.79                                      | 0.69        | 0.67        |
| <b>Median</b>    | 1.32                                       | 1.29        | 1.22        | 1.05                                      | 1.15        | 1.09        |
| <b>Mean ± SD</b> | 1.37 ± 0.35                                | 1.29 ± 0.32 | 1.32 ± 0.38 | 1.12 ± 0.25                               | 1.10 ± 0.29 | 1.13 ± 0.31 |

**Supplementary Table S13.** Parameter estimates from MLR model using information from FDOPA only (absolute values and changes).

| <b>Multiple Linear Regression Model for Predicting Overall Survival (MLR-2)</b> |                            |                |
|---------------------------------------------------------------------------------|----------------------------|----------------|
| <b>Predictor Variable</b>                                                       | <b>Parameter Estimates</b> | <b>P-value</b> |
| FDOPA $k_3$ absolute value at S1                                                | -7993.19                   | 0.0042         |
| FDOPA $V_d$ absolute value at S1                                                | -662.05                    | 0.0049         |
| FDOPA $K_1$ ratio (S3/S2)                                                       | -380.15                    | 0.0135         |
| Intercept                                                                       | +1702.61                   | <.0001         |

\*  $R^2 = 0.50$ , adjusted- $R^2 = 0.41$ , root MSE = 194 days, and the average variance inflation factors were  $\cong 1.5$ .

S1 = Baseline FDOPA PET, S2 = FDOPA PET at 2 weeks after start of treatment, S3 = FDOPA PET at 6 weeks after start of treatment.

21

**Supplementary Table S14.** Parameter estimates from MLR model using information from FLT and FDOPA combined (absolute values and changes).

| <b>Multiple Linear Regression Model for Predicting Overall Survival (MLR-3)</b> |                            |                |
|---------------------------------------------------------------------------------|----------------------------|----------------|
| <b>Predictor Variable</b>                                                       | <b>Parameter Estimates</b> | <b>P-value</b> |
| FLT $k_4$ ratio (S3/S1)                                                         | +158.66                    | <.0001         |
| FLT $k_2$ ratio (S3/S2)                                                         | +314.86                    | <.0001         |
| FDOPA tumor-to-striatum $SUV_{late}$ ratio (S2/S1)                              | -450.85                    | <.0001         |
| Intercept                                                                       | +354.23                    | <.01           |

\*  $R^2 = 0.86$ , adjusted- $R^2 = 0.83$ , root MSE = 104 days, and the average variance inflation factors were  $\cong 1$ .

S1 = Baseline PET, S2 = PET at 2 weeks after start of treatment, S3 = PET at 6 weeks after start of treatment.

## APPENDIX

Since FDOPA does not cross the red blood cell membrane and is confined to the plasma component when it is in blood (Appendix Figure A1), we had to somehow convert the total  $^{18}\text{F}$  activity concentration in whole blood (which we measured from the dynamic PET images) to the total FDOPA activity concentration in plasma. To do this, we used the following formula:

$$C_{wb}(t) = (1 - Hct) \times C_{FDOPA}(t)_p + f_{OMFD}(t) \times [C_{FDOPA}(t) + C_{OMFD}(t) + C_{METS}(t)]_p + (1 - Hct) \times f_{METS}(t) \times [C_{FDOPA}(t) + C_{OMFD}(t) + C_{METS}(t)]_p$$

where

$$(C_{F-18\ total})_{plasma} = [C_{FDOPA}(t) + C_{OMFD}(t) + C_{METS}(t)]_p.$$

In order to solve the above equation, we need to find a relationship between the total  $^{18}\text{F}$  activity in plasma and the total  $^{18}\text{F}$  activity in whole blood. This can be done using the following formula:

$$\frac{(C_{F-18\ total})_{plasma}}{(C_{F-18\ total})_{wb}} = \frac{[C_{FDOPA}(t) + C_{OMFD}(t) + C_{METS}(t)]_p}{(1 - Hct) \times [C_{FDOPA}(t) + C_{METS}(t)]_p + C_{OMFD}(t)_p}$$

which can be reduced in terms of the fractional plasma radioactivity using the following mathematical trick:

$$\frac{(C_{F-18 \text{ total}})_{\text{plasma}}}{(C_{F-18 \text{ total}})_{\text{wb}}} = \frac{[C_{FDOPA}(t) + C_{OMFD}(t) + C_{METS}(t)]_p}{(1 - Hct) \times [C_{FDOPA}(t) + C_{METS}(t)]_p + C_{OMFD}(t)_p} \cdot \frac{1}{\frac{(C_{F-18 \text{ total}})_{\text{plasma}}}{1}}{\frac{1}{(C_{F-18 \text{ total}})_{\text{plasma}}}}$$

$$\frac{(C_{F-18 \text{ total}})_{\text{plasma}}}{(C_{F-18 \text{ total}})_{\text{wb}}} = \frac{[f_{FDOPA}(t) + f_{OMFD}(t) + f_{METS}(t)]_p}{(1 - Hct) \times [f_{FDOPA}(t) + f_{METS}(t)]_p + f_{OMFD}(t)_p}$$

This can be further reduced to:

$$\frac{(C_{F-18 \text{ total}})_{\text{plasma}}}{(C_{F-18 \text{ total}})_{\text{wb}}} = \frac{1}{(1 - Hct) \times [1 - f_{OMFD}(t)_p] + f_{OMFD}(t)_p}$$

using the fact that  $[f_{FDOPA}(t) + f_{OMFD}(t) + f_{METS}(t)]_p = 1$ .

Since we now found a relationship between the total  $^{18}\text{F}$  activity in plasma and the total  $^{18}\text{F}$  activity in whole blood, we can solve our initial equation which sought to find a relationship between the total  $^{18}\text{F}$  activity concentration in whole blood and the total FDOPA activity concentration in plasma.

Thus,

$$C_{FDOPA}(t)_p = C_{\text{wb}}(t) \times \frac{(1 - \mu(t) \cdot [f_{OMFD}(t) + (1 - Hct) \cdot f_{METS}(t)]_p)}{(1 - Hct)}$$

where

$$\frac{(C_{F-18 \text{ total}})_{\text{plasma}}}{(C_{F-18 \text{ total}})_{\text{whole blood}}} = \mu(t).$$

At very short  $t$ ,  $\frac{(C_{F-18\ total})_{plasma}}{(C_{F-18\ total})_{wb}} \cong \frac{1}{1-Hct}$  since  $f_{FDOPA}(t)_p$  is 1 and  $f_{OMFD}(t)_p$  and

$f_{METS}(t)_p$  are 0 (i.e., OMFD and METS have not formed yet). At very long  $t$ ,

$$\frac{(C_{F-18\ total})_{plasma}}{(C_{F-18\ total})_{wb}} \cong 1.$$

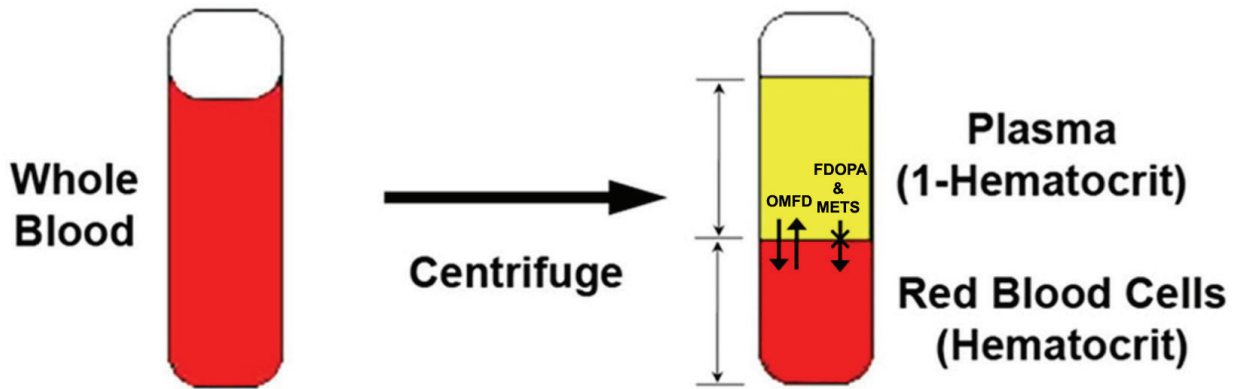

**Appendix Figure A1.** FDOPA does not cross the red blood cell membrane and is confined to the plasma space when it is in blood. OMFD, on the other hand, can cross the red blood cell membrane bidirectionally.



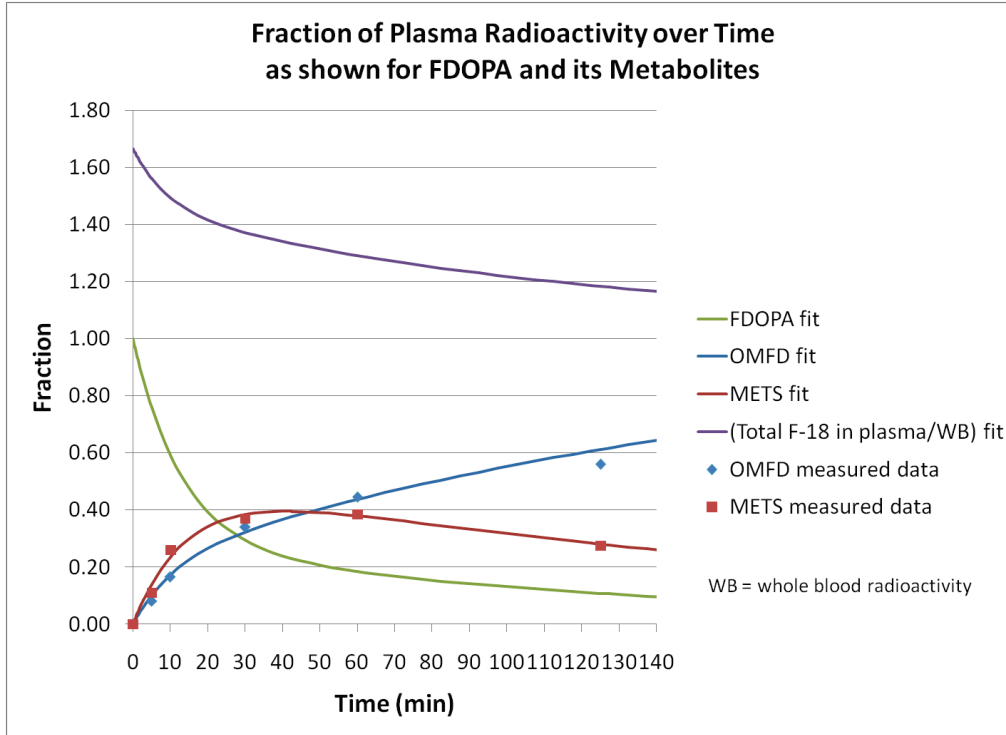

**Appendix Figure A2.** Fitted exponential curves to the measured fractions of plasma radioactivity for OMFD and METS. The measured data was taken from the publication of Huang *et al.* [8]. The equations for the fitted exponential curves are shown below:

$$f_{METS}(t)_p = 0.52 \times (e^{-0.004997t} - e^{-0.06892t})$$

$$f_{OMFD}(t)_p = 0.80 \times (1 - e^{-0.005337t}) + 0.20 \times (1 - e^{-0.09695t})$$

The decaying exponential curve (shown in green) represents the fraction of plasma radioactivity over time for FDOPA and was derived using the following relationship:

$$f_{FDOPA}(t)_p = 1 - [f_{OMFD}(t) + f_{METS}(t)]_p$$

The top descending purple curve is the total  $^{18}\text{F}$  activity in plasma divided by the total  $^{18}\text{F}$  activity in whole blood [i.e.,  $\mu(t)$ ].

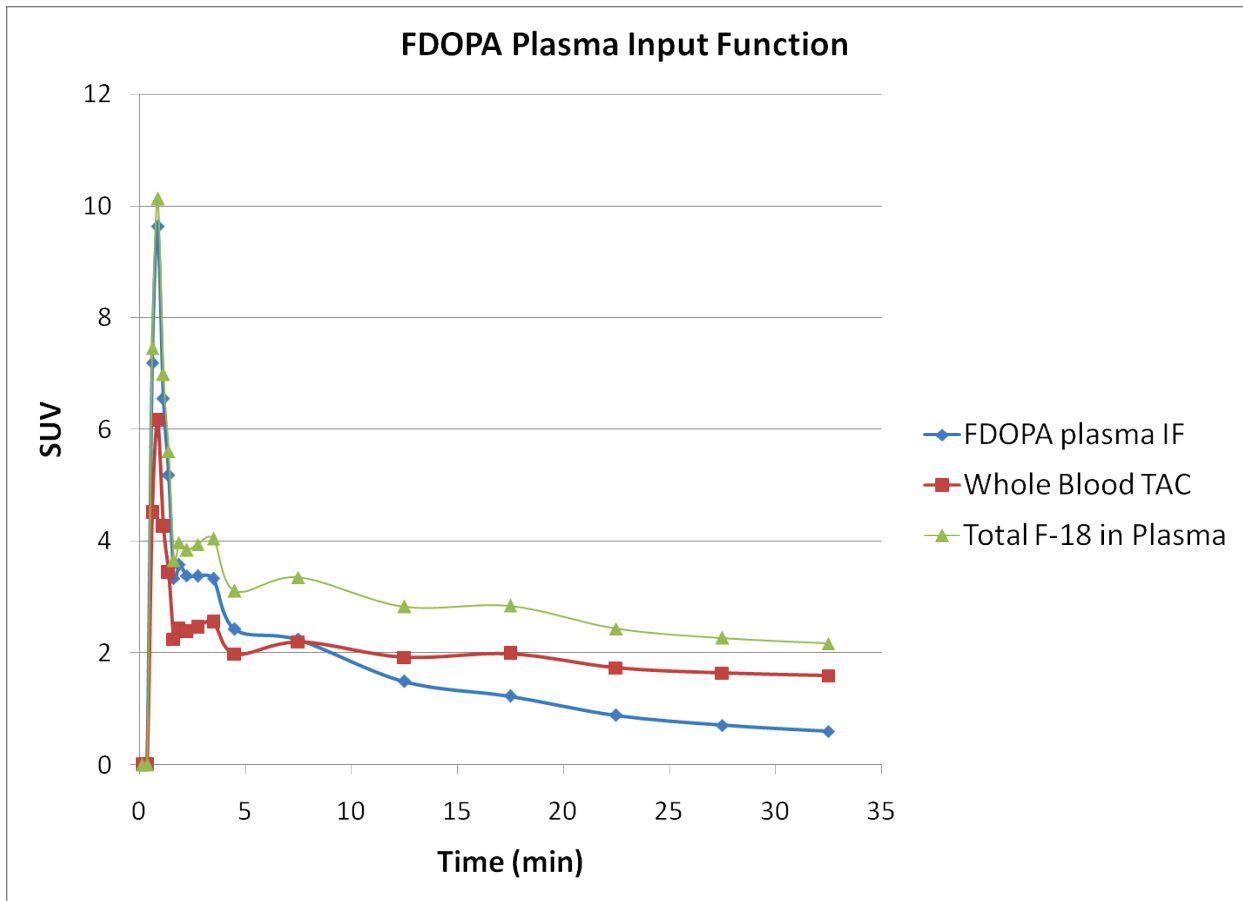

**Appendix Figure A3.** FDOPA plasma input function (shown in blue) after corrections for metabolites, hematocrit, and partial volume effects. Shown in red is the whole blood time-activity curve after partial volume correction only. Shown in green is the total  $^{18}\text{F}$  radioactivity in plasma.

## REFERENCES

1. Bading JR, Shields AF. Imaging of cell proliferation: status and prospects. *J Nucl Med.* 2008;49 Suppl 2:64S-80S.
2. Rasey JS, Grierson JR, Wiens LW, Kolb PD, Schwartz JL. Validation of FLT uptake as a measure of thymidine kinase-1 activity in A549 carcinoma cells. *J Nucl Med.* 2002;43:1210-7.
3. Shields AF, Grierson JR, Dohmen BM, Machulla HJ, Stayanoff JC, Lawhorn-Crews JM, et al. Imaging proliferation in vivo with [F-18]FLT and positron emission tomography. *Nature medicine.* 1998;4:1334-6.
4. Garnett ES, Firnau G, Nahmias C. Dopamine visualized in the basal ganglia of living man. *Nature.* 1983;305:137-8.
5. Barrio JR, Huang SC, Phelps ME. Biological imaging and the molecular basis of dopaminergic diseases. *Biochem Pharmacol.* 1997;54:341-8.
6. Stout DB, Huang SC, Melega WP, Raleigh MJ, Phelps ME, Barrio JR. Effects of large neutral amino acid concentrations on 6-[F-18]Fluoro-L-DOPA kinetics. *J Cereb Blood Flow Metab.* 1998;18:43-51.
7. Heiss WD, Wienhard K, Wagner R, Lanfermann H, Thiel A, Herholz K, et al. F-Dopa as an amino acid tracer to detect brain tumors. *J Nucl Med.* 1996;37:1180-2.
8. Huang SC, Barrio JR, Yu DC, Chen B, Grafton S, Melega WP, et al. Modelling approach for separating blood time-activity curves in positron emission tomographic studies. *Physics in medicine and biology.* 1991;36:749-61.
